# Hybridization enables the fixation of selfish queen genotypes in eusocial colonies

2

4 Arthur Weyna<sup>1</sup>, Jonathan Romiguier<sup>1,\*</sup>, Charles Mullon<sup>2,\*</sup>

<sup>1</sup> Institut des Sciences de l'Evolution (UMR 5554), University of Montpellier, CNRS

6 <sup>2</sup> Department of Ecology and Evolution, University of Lausanne, 1015 Lausanne, Switzerland

\*These authors share senior authorship.

8 Corresponding author: [jonathan.romiguier@umontpellier.fr](mailto:jonathan.romiguier@umontpellier.fr)

First author: [arthur.weyna@umontpellier.fr](mailto:arthur.weyna@umontpellier.fr)

10 Last author: [charles.mullon@unil.ch](mailto:charles.mullon@unil.ch)

**Statement of authorship:** AW, JR and CM conceived the study. AW performed the analysis and  
12 wrote the first draft of the manuscript under the guidance of JR and CM. All authors contributed to  
the final version.

14 **Data accessibility:** A Mathematica notebook that reproduces our results and a R file implementing  
our simulations are available here: <https://zenodo.org/record/5167179>.

16 **Keywords:** Eusociality, Hybridization, Parasitism, Caste determination, Genetic conflicts, Repro-  
ductive system, Social hybridogenesis, Hymenoptera, Ant.

18

## Abstract

20 A eusocial colony typically consists of two main castes: queens that reproduce and sterile workers that help them. This division of labour however is vulnerable to genetic elements that favour the development of their carriers into queens. Several factors, 22 such as intra-colonial relatedness, can modulate the spread of such caste-biasing genotypes. Here we investigate the effects of a notable yet understudied ecological setting: 24 where larvae produced by hybridization develop into sterile workers. Using mathematical modelling, we show that the coevolution of hybridization with caste determination readily triggers an evolutionary arms race between non-hybrid larvae that increasingly 26 develop into queens, and queens that increasingly hybridize to produce workers. Even where hybridization reduces worker function and colony fitness, this race can lead to 28 the loss of developmental plasticity and to genetically hard-wired caste determination. Overall, our results may help understand the repeated evolution towards remarkable 30 reproductive systems (e.g. social hybridogenesis) observed in many ant species.

## 32 **1 Introduction**

Eusociality is characterized by a striking division of reproductive labour between two castes: queens  
34 and workers (Crespi and Yanega, 1995). Queens monopolize reproduction, while typically sterile  
workers specialize on other colony tasks such as foraging and tending to the brood. The sterility of  
36 workers initially seemed so inconsistent with natural selection that Darwin referred to eusociality  
as his “one special difficulty” (Darwin, 1859, ch. 7). This apparent paradox was resolved in the  
38 1960’s with W. D. Hamilton’s theory of kin selection (Hamilton, 1964). Hamilton demonstrated  
that natural selection can favour eusociality when workers preferentially help relatives (who can  
40 transmit the same genetic material). In addition to laying the theoretical basis for the evolution of  
eusociality, Hamilton’s work led to the insight that caste determination should be plastic to allow  
42 identical gene copies to be in workers and in the queen they help (Seger, 1981). In line with this  
notion, the developmental fate of female larvae in many eusocial insects depends on environmental  
44 factors (Trible and Kronauer, 2017), such as food quantity and quality (Brian, 1956; Brian, 1973),  
temperature and seasonality (Brian, 1974; Schwander et al., 2008) or signals emitted by adults of the  
46 colony (Penick and Liebig, 2012; Libbrecht et al., 2013). Probably the most iconic example of such  
plasticity is found in honeybees where queens arise only from larvae reared in royal cells and fed  
48 with royal jelly. For long, this and many other empirical findings strengthened the idea that caste  
determination is under strict environmental control and largely free from genetic effects.

50 More recently however, substantial genetic variation for caste determination has been described  
across a number of eusocial species (Winter and Buschinger, 1986; Moritz et al., 2005; Hartfelder  
52 et al., 2006; Linksvayer, 2006; Schwander and Keller, 2008; Smith et al., 2008; Frohschammer and  
Heinze, 2009; Schwander et al., 2010). This variation is thought to derive from caste-biasing geno-  
54 types which bias the development of their carrier towards a particular caste (Moritz et al., 2005;  
Hughes and Boomsma, 2008). Those genotypes that favour larval development towards the repro-  
56 ductive caste have sometimes been referred to as “royal cheats” as they cause the individuals that  
carry them to increase their own direct reproduction at the expense of other colony members (e.g.  
58 Anderson et al., 2008; Hughes and Boomsma, 2008). The segregation of such royal cheats should  
depend on a balance between: (1) direct benefits from increased representation in the reproductive  
60 caste; and (2) indirect costs due to reduced worker production and colony productivity (Hamilton,  
1964). As highlighted by abundant theory, several factors can influence these benefits and costs and  
62 thus tip the balance for or against the evolution of royal cheats. For instance, low relatedness be-

tween larvae due to polyandry (when queens mate with multiple males) or polygyny (when colonies  
64 have multiple queens) increases competition between genetic lineages within colonies and thereby  
favours royal cheating (e.g. Reuter and Keller, 2001). Conversely, selection against cheats is bolstered  
66 by low dispersal abilities and high within-group relatedness (e.g. Hamilton, 1964; Lehmann et al.,  
2008; Boomsma, 2009), bivoltinism and asymmetrical sex-ratio (e.g. Trivers and Hare, 1976; Seger,  
68 1983; Alpedrinha et al., 2014; González-Forero, 2015; Quiñones and Pen, 2017), coercion (i.e. polic-  
ing, Wenseleers et al., 2004; Dobata, 2012), queen longevity and competition between queens (e.g.  
70 Queller, 1994; Bourke and Chan, 1999; Avila and Fromhage, 2015), or where workers reproduce  
following queen death (Field and Toyozumi, 2020).

72 One intriguing factor that has been proposed to influence the cost of royal cheating is sperm par-  
asitism, a behavior consisting in queens using the sperm of another species or lineage to produce  
74 hybrid workers (Linksvayer, 2006; Anderson et al., 2008). Both morphological and genetic data  
suggest that this behaviour is common in many ant species (e.g. in multiple *Temnothorax* popula-  
76 tions, the majority of queens were found to produce some hybrid workers, Douwes and Stille, 1991;  
Umphrey, 2006 and Feldhaar et al., 2008 for reviews). In these species, sperm parasitism results in  
78 hybrid larvae that rarely, if ever, develop as fertile queens and rather become sterile workers (pre-  
sumably due to genetic incompatibilities between parental lineages, Feldhaar et al., 2008; Tribble and  
80 Kronauer, 2017). Such hybrids should therefore be impervious to genetic caste-biasing effects and  
thus provide a reliable source of workers. In principle, this alternative supply of workers may reduce  
82 the indirect cost of royal cheats and hence favours their evolution (Anderson et al., 2008). But be-  
yond these broad-brush predictions, the effect of sperm parasitism on the segregation of royal cheats  
84 remains poorly understood.

Here, we develop a mathematical model to explore the evolution of genetic caste determination via  
86 royal cheats when queens can hybridize to produce workers. In particular, we assess the effects of key  
factors on the evolutionary dynamics of caste determination, such as polyandry and queen partheno-  
88 genesis (when queens have the ability to produce daughters asexually), as well as their interactions  
with potential costs and benefits of hybridization, for instance owing to hybrid incompatibilities or  
90 hybrid vigor.

## 2 The model

92 We consider a large population of annual eusocial haplodiploids with the following life-cycle (fig. 1).  
First, virgin queens mate with a fixed number  $m \in \{1, 2, \dots\}$  of males. Each of these mates can either  
94 be an allo- (with probability  $\eta$ ) or a con-specific male (with complementary probability  $1 - \eta$ ). Once  
mated, queens found monogynous colonies (i.e. one queen per colony) and lay a large number of  
96 eggs. A proportion  $f$  of these eggs are diploid (and develop into females) and  $(1 - f)$  are haploid (and  
develop into males). Assuming random egg fertilization, a queen therefore produces on average  $f\eta$   
98 hybrid and  $f(1 - \eta)$  non-hybrid females. We assume that a hybrid female can only develop as a  
worker, while a non-hybrid female can either develop as a worker (with probability  $\omega$ ) or as a queen  
100 (with complementary probability  $1 - \omega$ ). Overall, a colony thus consists of  $f\eta$  hybrid and  $f(1 - \eta)\omega$   
non-hybrid sterile workers, as well as  $f(1 - \eta)(1 - \omega)$  virgin queens and  $(1 - f)$  males that are available  
102 for reproduction at the next generation.

If only virgin queens and males can reproduce, their reproductive success depends on the workforce  
104 of their colony of origin. Specifically, we assume that the probability that a sexual reaches the mating  
pool increases linearly with the total number of workers in the colony, combining hybrid and non-  
106 hybrid workers (we show later that our results do not change qualitatively when the increase is  
non-linear). We nonetheless allow for differential contribution to the workload between hybrid and  
108 non-hybrid workers, with the contribution of hybrid workers weighted by a parameter  $e \geq 0$  (so that  
the effective workforce of a colony is  $ef\eta + f(1 - \eta)\omega$ ). When  $e = 1$ , hybrid workers have the same  
110 working efficiency as non-hybrid workers. By contrast, when  $e < 1$ , hybrid workers are less efficient  
for instance due to outbreeding depression. This can also reflect other potential costs associated with  
112 hybridization, such as the production of sterile or non-viable hybrid queens (Feldhaar et al., 2008).  
Conversely, when  $e > 1$  hybrid workers outperform regular workers, due for example to hybrid vigor  
114 (Umphrey, 2006).

## 3 Results

### 116 3.1 Hybridization and sperm parasitism, even costly, can lead to the fixation of royal cheats and the complete loss of intraspecific workers

118 We first investigate the evolution of caste determination by allowing the probability  $\omega$  that a larva  
develops as a worker to vary. We assume that this probability is under individual genetic control (i.e.  
120 the future caste of a female larva depends only on its own genotype) and that it evolves via random  
mutations with weak additive phenotypic effects (Appendix A for details on our methods). Muta-  
122 tional effects are unbiased so a new mutation is equally likely to increase or decrease the tendency  
 $\omega$  of becoming a worker. Those mutations that decrease  $\omega$  can be considered as more selfish as they  
124 increase the likelihood that their carriers develop into queens at the expense of other individuals  
of the same colony. Following the terminology of Hughes and Boomsma (2008), we thus refer to  
126 mutations decreasing  $\omega$  as “royal cheats”. As a baseline, we consider the case where queens mate  
with a large number of males (i.e.  $m \rightarrow \infty$ ) and where hybridization is fixed at a given level (e.g.  $\eta$   
128 is the proportion of allo-specific males in the pool of mates from which females choose randomly).

Our analyses (Appendix B.1.1) reveal that the probability for a larva to develop as a worker evolves  
130 towards a unique and stable equilibrium,

$$\omega^* = \frac{1}{3} - e \frac{2\eta}{3(1-\eta)}. \quad (1)$$

To interpret this equation (1), consider first the case where hybridization is costless ( $e = 1$ ). Eq. (1)  
132 then tells that in the absence of hybridization ( $\eta = 0$ ), a larva will develop into a worker with a prob-  
ability of  $1/3$  at equilibrium (in line with previous models that ignore hybridization, e.g. Reuter and  
134 Keller, 2001, Appendix B.1.4 for connection). But as hybridization increases ( $\eta > 0$ ), royal cheat-  
ing is increasingly favored and larvae become increasingly likely to develop as queens rather than  
136 workers (i.e.  $\omega^* < 1/3$ , fig. 2A). In fact past a threshold of hybridization ( $\eta \geq 1/3$ ), the population  
evolves towards a complete loss of non-hybrid workers via the fixation of increasingly caste-biasing  
138 royal cheats alleles ( $\omega \rightarrow 0$ ). In this case, non-hybrid females eventually all develop into queens that  
rely on sperm parasitism to produce workers.

140 Equation (1) also shows that the performance of hybrid workers relative to non-hybrids,  $e$ , modulates  
the effect of hybridization on the evolution of caste determination (fig. 2B). As a result, royal cheat-

142 ing and worker-loss evolution are facilitated when hybrids outperform regular workers ( $e > 1$ ) but  
hindered otherwise ( $e < 1$ ). Nevertheless, even where hybridization is extremely costly ( $0 < e \ll 1$ ),  
144 there exists a threshold of hybridization above which complete worker-loss evolves (fig. 2C).

### 146 **3.2 Worker-loss readily emerges from the coevolution of genetic caste determina- tion and sperm parasitism, driven by intra-colonial conflict**

The above analysis indicates that intraspecific worker-loss can evolve when queens have a suffi-  
148 ciently high tendency to hybridize. This raises the question of whether such tendency is also subject  
to selection. To answer this question, we allow the probability  $\eta$  that a queen's mate is allospecific to  
150 coevolve with caste determination ( $\omega$ ). We assume that this probability  $\eta$  is under individual queen  
control (i.e. it depends only on a queen's genotype) and like caste determination, evolves via rare  
152 mutations with weak additive phenotypic effects (Appendix A for details).

We find that depending on the efficiency  $e$  of hybrid workers, the coupled evolutionary dynamics  
154 of hybridization  $\eta$  and caste determination  $\omega$  lead to an evolutionary arms race with one of two  
contrasted outcomes (Appendix B.1.2 for analysis). When  $e$  is small ( $e \leq 1/4$ , fig. 3A gray region), the  
156 population evolves hybridization avoidance ( $\eta \rightarrow 0$ ) while the probability  $\omega$  to develop as a worker  
stabilises for its baseline equilibrium ( $\omega^* = 1/3$ , fig. 3B). By contrast, when hybrid workers are at  
158 least half as efficient as regular workers ( $e \geq 1/2$ , fig. 3A, dark green region), intraspecific worker-  
loss evolves ( $\omega \rightarrow 0$ ) and hybridization stabilizes at an intermediate equilibrium ( $\eta^* = 2/3$ , fig. 3D).  
160 When hybrid worker efficiency is intermediate ( $1/4 < e < 1/2$ , fig. 3A, light green region), the  
population evolves either hybridization avoidance or intraspecific worker-loss depending on initial  
162 conditions (fig. 3C), with worker-loss favoured by high initial tendency  $\eta$  of queens to hybridize.  
In sum, provided four hybrid workers are at least as good as one regular worker ( $e > 1/4$ ), the  
164 coevolution of genetic caste determination and hybridization can lead to worker-loss in our model.

To better understand the forces at play in the emergence of worker-loss, we further used a kin-  
166 selection approach to decompose the invasion fitness of mutant alleles into the sum of: (1) their  
direct fitness effects on the reproductive success of the individuals that express them; and (2) of  
168 their indirect fitness effects on other related individuals that can also transmit them (Taylor and  
Frank, 1996, Appendix B.1.3 for details). Starting with a population at the baseline equilibrium in  
170 absence of hybridization ( $\omega = 1/3$ ,  $\eta = 0$ ), we tracked these different fitness effects along a typical  
evolutionary trajectory that leads to worker-loss (black arrow heads, fig. 3D) for alleles that influence

172 the tendency of a larva to develop as a worker (fig. 3E) and of a queen to hybridize (fig. 3F).

Our kin selection analysis reveals that alleles which increase hybridization in queens are selected  
174 because they allow queens to increase the number of sexuals produced by their colony (especially  
via males, blue curve, fig. 3F). This is because the baseline tendency  $\omega$  to develop as a worker that  
176 evolves is optimal from the point of view of a gene in a larvae, but sub-optimal from the point of view  
of a gene in a queen who would benefit from a larger workforce. Hybridization by queens evolves to  
178 rectify this and align colony composition with the interests of the queen. Simultaneously, as queens  
evolve greater hybridization and augment their workforce with hybrids, genes in non-hybrid larva  
180 have an increasing interest for their carriers to develop as queens rather than workers (fig. 3E). These  
two selective processes via queens and larvae fuel one another in an evolutionary arms race whose  
182 endpoint is complete intraspecific worker-loss. Our decomposition of fitness effects thus shows that  
the loss of non-hybrid workers evolves in our model due to within-colony conflicts over colony com-  
184 position. In fact, our results suggests that worker-loss emerges because hybridization allows queens  
to control the production of workers in their colony, while non-hybrid larvae lose their tendency to  
186 develop as workers to promote their own reproduction via the fixation of royal cheats.

### 3.3 Worker-loss is impaired by low polyandry but facilitated by asexual reproduction

188

So far, we have assumed that queens mate with a large, effectively infinite, number of males. By  
190 increasing relatedness within the brood, low polyandry ( $2 \leq m \ll \infty$ ) and monandry ( $m = 1$ ) me-  
diate within-colony conflicts and therefore should be relevant to the evolutionary arms race leading  
192 to worker-loss (Anderson et al., 2008; Schwander et al., 2010). To test this, we investigated the effect  
of mate number  $m$  on the coevolution of  $\omega$  and  $\eta$  (Appendix B.2.1 for details).

194 We find that as the number  $m$  of mates decreases, the conditions for intraspecific worker-loss emer-  
gence become more restrictive. Specifically, the threshold of hybrid worker efficiency  $e$  above which  
196 worker-loss always evolves increases as polyandry decreases (as  $m \rightarrow 1$ , fig. 4A, dark green region).  
In addition, when the number of mates is low ( $m \leq 4$ ), evolutionary dynamics do not necessarily  
198 lead to either complete worker-loss or hybridization avoidance. For intermediate values of  $e$  (fig. 4A,  
blue region) the population actually converges to an intermediate state where queens partially hy-  
200 bridize ( $0 < \eta^* < 1$ ) and larvae retain developmental plasticity ( $0 < \omega^* < 1$ , fig. 4B, Appendix B.2.1  
and fig. S1 for analysis). Under monandry ( $m = 1$ ) the evolution towards such intermediate state



202 always happens when hybrid workers outperform regular workers ( $e > 1$ , fig. 4A, blue region).

In the special case of monandry and overperforming hybrid workers ( $m = 1$  and  $e > 1$ ), our mathematical analysis further shows that partial hybridization and larval plasticity is not evolutionary stable (Appendix B.2.1, figs. S1-S2). Rather, the population experiences disruptive selection which should favour the emergence of polymorphism. To test this, we performed individual based simulations under conditions predicted to lead to polymorphism (fig. 4C). These show the emergence and long-term coexistence of two types of queens: one which hybridizes with low probability (and reproduces via both males and queens); and another which mates almost exclusively with allospecific males and thus reproduces mostly via males (because  $m = 1$ , these queens only produce hybrid workers and males). Beyond this special case, the evolution of worker-loss is impeded by low polyandry and impossible under monandry in our model. This is because with a low number of mates, a queen runs the risk of being fertilized by only one type of male. Under complete worker-loss (when the population is fixed for  $\omega = 0$ ), a queen mated to only conspecific males produces only larvae destined to be queens but no workers to ensure their survival and thus has zero fitness.

216 Our finding that monandry inhibits the emergence of worker-loss contrasts with the observation that several ant species, notably of the genus *Cataglyphis*, lack non-hybrid workers and rely on sperm parasitism for workers in spite of being mostly monandrous (Kuhn et al., 2020). One potential mechanism that could have allowed such evolution is thelytokous parthenogenetic reproduction by queens, whereby queens can produce daughters clonally. This reproduction mode, which is common in eusocial Hymenoptera (Rabeling and Kronauer, 2013) and in particular in *Cataglyphis* (Kuhn et al., 2020), could allow queens fertilized exclusively by allospecific males to nevertheless produce queens via parthenogenesis. To investigate how thelytokous parthenogenesis influences the evolution of caste determination, we extend our model so that a fraction  $c$  of the female progeny of queens is produced parthenogenetically (Appendix B.2.2 for details). We assume that larvae produced in such a way are equivalent to non-hybrid larvae: they develop into workers with a probability  $\omega$  determined by their own genotype (which in this case is the same as their mother's genotype) and if they develop into workers, they have the same working efficiency as non-hybrid workers (i.e. there is no direct cost or benefit to parthenogenesis).

230 The coevolutionary dynamics of caste determination and hybridization with parthenogenesis are in general too complicated to be tractable. We could nonetheless gain insights into worker-loss evolution by performing an invasion analysis, asking (1) when is worker-loss ( $\omega = 0$ ) evolution-

ary stable (so that a population where intraspecific workers have been lost cannot be invaded by a  
234 genetic mutant with developmental plasticity)? And (2) when can hybridization evolve when ab-  
sent in the population (i.e. when is  $\eta = 0$  evolutionary unstable)? When these two conditions are  
236 met, evolution will tend to favour the emergence and maintenance of worker-loss (as in fig. 3D for  
e.g.). We thus studied when conditions (1) and (2) above are both true in terms of parthenogenesis  
238  $c$ , as well as hybrid workers efficiency  $e$  and mate number  $m$ . This revealed that parthenogenesis  
has a non-monotonic relationship with worker-loss evolution (fig. 5A & 5B). As parthenogenesis  
240 increases from zero, worker-loss evolution is initially favoured, especially under monandry (as ex-  
pected; fig. 5C for e.g.; see eq. (B-26) in the Appendix for details). But past a threshold of partheno-  
242 genesis, the conditions leading to worker-loss become increasingly stringent until such evolution  
becomes impossible (see eq. (B-25) in the Appendix for details). This is because as parthenogenesis  
244 increases, the relatedness among a queen and larvae of the same colony also increases. The con-  
flict between them, which fuels the evolution of worker-loss, therefore abates until it is no longer  
246 advantageous for a larva to preferentially develop as a queen.

We additionally computed the level of hybridization favoured by selection when the population has  
248 evolved worker-loss (and this is an evolutionarily stable state). We find that hybridization increases  
as queens mate with fewer males and as parthenogenesis increases (fig. 5D), so much so that se-  
250 lection can lead to complete hybridization ( $\eta = 1$ , e.g. fig. 5C). As a result, there exists a range of  
intermediate values of parthenogenesis for which worker-loss evolves in association with a com-  
252 plete loss of intraspecific matings, i.e. queens never mate with males of their own species or lineage.  
These males are nevertheless still being produced in our model (as the primary sex ratio is such that  
254  $f < 1$ ).

## 4 Discussion

256 In sum, our analyses indicate that worker-loss readily evolves when queens can hybridize with a  
lineage of males by whom fertilization leads to the production of workers. This evolution in our  
258 model occurs through a sequence of substitutions of alleles that increasingly bias the development of  
their carrier towards the queen caste, i.e. “royal cheats”. Hybridization, or sperm parasitism, allows  
260 royal cheats to fix in the population by providing a way for colonies to compensate for the reduced  
workforce. In fact, when queens are capable of recognising genetic differences among males and  
262 when royal cheats are present in the population, selection favours hybridization by queens to regain

control over caste allocation in their colony. This in turn promotes greater cheating by larvae, which  
264 favours greater hybridization by queens and so on. This evolutionary arms race, fuelled by intra-  
colonial conflicts, eventually leads to complete intraspecific worker-loss: a state where larvae have  
266 lost their developmental plasticity and develop as workers or queens depending only on whether  
they are the product of hybridization or not, respectively.

#### 268 **4.1 Model limitations**

Of course, our analyses are based on several idealized assumptions. In particular, we assumed that  
270 the probability for larvae to develop as workers is under complete larval genetic control. Typically  
the developmental fate of female larvae also depends on various environmental factors created by  
272 adult colony members, such as food quality and quantity (Brian, 1956; Tribble and Kronauer, 2017),  
or mechanical (Penick and Liebig, 2012) and chemical (Schwander et al., 2008; Penick et al., 2012)  
274 stimuli. The conclusions of our study apply as long as these environmental effects are held constant  
(or evolve more slowly than genetic caste determination). In this case, worker-loss would emerge  
276 via royal cheats that modify larval developmental reaction norm to environmental effects in such a  
way that their carriers are more likely to develop as queens (Hughes and Boomsma, 2008; Wolf et al.,  
278 2018). We also assumed that caste determination and hybridization evolve via rare mutations with  
weak additive effects at a single locus. These assumptions, which are typical to adaptive dynam-  
280 ics and kin selection approaches, have been extensively discussed elsewhere in a general context  
(Frank, 1998; Rousset, 2004; Geritz and Gyllenberg, 2005; Dercole and Rinaldi, 2008). In particular,  
282 all our results extend to the case where traits are determined by many genes, provided genetic vari-  
ance in the population remains small (Charlesworth, 1990; Iwasa et al., 1991; Abrams et al., 1993).  
284 Where mutations have large additive or dominance effects, we expect more complex evolutionary  
dynamics, such as genetic polymorphism. These dynamics can nonetheless be straightforwardly  
286 investigated with the recurrence equations we derived (eq. A-4 in Appendix). However, our model  
cannot accommodate potential interaction effects among loci (i.e. epistasis). If a quantitative genet-  
288 ics analysis in *Temnothorax curvispinosus* supports that caste determination is influenced by additive  
effects in this species (Linksvayer, 2006), only epistatic effects were found in *Pogonomyrmex rugosus*  
290 (Schwander and Keller, 2008). It would therefore be relevant in the future to allow for a more a  
complex genetic basis of caste determination, including epistasis (in particular in the context of the  
292 evolution of unorthodox reproductive systems, see next section). Another important assumption we  
made is that hybrid larvae do not develop into fertile queens, for instance owing to hybrid incom-

294 patibilities (Tribble and Kronauer, 2017). If fertile hybrid queens are produced regularly, evolution  
towards worker-loss like in our model is less likely to happen as hybrids no longer make a reliable  
296 source of workers. In ants at least, the idea that hybrid queens are rarely fertile is supported by the  
contrast between high frequency of interspecific mating on one hand, and weak genetic signals of  
298 interspecific gene flow on the other (Umphrey, 2006; Feldhaar et al., 2008). Finally, we focused in  
the main text on the case where colony productivity increases linearly with workers (i.e. the proba-  
300 bility that a sexual survives until reproduction increases linearly with the number of workers). More  
realistically, the gain in productivity brought by one additional worker is likely to decrease with in-  
302 creasing workforce (Nonacs and Tobin, 1992; Reuter and Keller, 2001). Such diminishing returns  
tend to favor cheating because the indirect benefit of developing into a worker gets smaller as colony  
304 size increases (e.g. Reuter and Keller, 2001; Field and Toyozumi, 2020). In line with this, we find  
that worker-loss evolves even more easily under diminishing compared to linear returns (Appendix  
306 B.2.3 and fig. S3).

## 4.2 An adaptive path to unorthodox reproductive systems?

308 Our result that sperm parasitism favours the emergence of worker-loss via the fixation of royal cheats  
may be relevant to unorthodox reproductive systems found in ants. Of particular interest is so-  
310 cial hybridogenesis, whereby females produced through regular intra-lineage mating or thelytok-  
ous parthenogenesis develop into queens, while workers emerge from eggs fertilised by allospecific  
312 males (Helms Cahan et al., 2002; Helms Cahan and Keller, 2003; Anderson et al., 2006; Romigu-  
ier et al., 2017; Lacy et al., 2019; Kuhn et al., 2020). Such a striking system was first described just  
314 two decades ago in *Pogonomyrmex* harvester ants (Helms Cahan et al., 2002), and has since been  
found in several species spread across 4 genera (Helms Cahan and Keller, 2003; Romiguier et al.,  
316 2017; Lacy et al., 2019; Kuhn et al., 2020). If these observations suggest that social hybridogenesis  
has evolved independently multiple times, the evolutionary origins of this complex system remain  
318 poorly understood (Anderson et al., 2008; Schwander et al., 2010; Lavanchy and Schwander, 2019).  
One early suggestion is based on the hypothesis that worker development requires the combination  
320 of co-adapted alleles at key loci (i.e. requires epistatic interactions, Helms Cahan and Keller, 2003).  
According to this theory, worker-loss in hybridogenetic lineages would have originated in the ran-  
322 dom loss of such combinations during episodes of ancestral hybridization. Present hybridization  
would then have evolved to restore genetic combinations and epistatic interactions in F1-hybrids  
324 allowing for worker development.

Here, we have shown mathematically that social hybridogenesis could also result from additive genetic effects on caste development and queen-larvae conflicts within colonies. This theory, previously described verbally in Anderson et al. (2006) and Anderson et al. (2008), may help explain the multiple convergence towards social hybridogenesis because virtually every sexual eusocial species should experience queen-larvae conflicts over caste investment. Furthermore, because this path to social hybridogenesis does not depend on changes in the sympatric species whose sperm is parasitized, our model is relevant to both cases of asymmetrical (where the sympatric species produces workers through regular sex, as in *Solenopsis xyloni* for e.g.; Helms Cahan and Keller, 2003) and symmetrical social hybridogenesis (where the sympatric species also produces workers via hybridization, as in *Pogonomyrmex* harvester ants for e.g.; Anderson et al., 2006).

Our model may also be relevant to other unorthodox systems of reproduction such as those found in populations of *Wasmannia auropunctata* (Fournier et al., 2005), *Vollenhovia emeyri* (Ohkawara et al., 2006) or *Paratrechina longicornis* (Pearcy et al., 2011). As with some forms of social hybridogenesis, queens of these systems produce their reproductive daughters via female parthenogenesis and their workers via sex with genetically distant males. In contrast to social hybridogenesis, however, these males belong to a divergent all-male lineage maintained by male clonality. This is further accompanied with a complete absence of arrhenotokous males (i.e. queens never make hemiclinal haploid sons, as shown in *W. auropunctata*, Rey et al., 2013). When queens are able to produce daughters parthenogenetically in our model, evolution can lead to a state where worker-loss is coupled with a complete absence of intra-lineage mating (i.e.  $\eta = 1$ , fig. 5C-D). In this state, arrhenotokous males represent a genetic dead-end, laying the basis for their disappearance. To investigate these systems in more detail, it would be interesting to extend our model to consider the evolution of female parthenogenesis and male clonality.

Our formal approach is especially useful in a context where hybrid vigour in workers has been raised to explain the evolutionary origin of social hybridogenesis and other hybridization-dependent systems (Julian and Cahan, 2006; Umphrey, 2006; Anderson et al., 2008; Feldhaar et al., 2008; Schwander et al., 2010). According to this argument, selection favoured hybridization because hybrid workers are more efficient, more resilient, or better suited to exploit marginal habitats than regular workers. But in spite of much effort, empirical evidence supporting hybrid vigor in workers is still lacking (Robertson and Ross, 1990; Julian and Cahan, 2006; Feldhaar et al., 2008, but see James et al., 2002). Further challenging this view, we have shown here that hybrid vigor is not necessary to the evolution of hybridization-dependent reproductive systems. In fact, our results demonstrate that these systems

can easily evolve even when hybridization is costly due to pre- and post-zygotic barriers (i.e. when  
358  $e < 1$  for e.g. because hybridization leads to an inefficient workforce due to hybrid incompatibilities  
in workers; or increased efforts in mate-finding and mating, Maroja et al., 2014; or the production  
360 of non-viable or infertile hybrid queens, Umphrey, 2006; Feldhaar et al., 2008). In contrast to pre-  
vious suggestions (Anderson et al., 2008), our model thus indicates that hybridization-dependent  
362 reproductive systems can emerge among species that have already substantially diverged, and can  
be maintained even with further accumulation of hybrid incompatibilities.

364 More generally, our results suggest that natural selection can lead to an association between hy-  
bridization and caste determination. To date, such associations have been reported in only 18 dis-  
366 tinct ant species or populations (Helms Cahan et al., 2002; Helms Cahan and Keller, 2003; Fournier  
et al., 2005; Anderson et al., 2006; Ohkawara et al., 2006; Pearcy et al., 2011; Romiguier et al., 2017;  
368 Lacy et al., 2019; Kuhn et al., 2020). But this rarity may be due – at least partly – to the difficulty  
with describing these systems (which in particular requires sampling and genotyping both queens  
370 and workers of the same populations, Helms Cahan et al., 2002). For instance, studies specifically  
testing for social hybridogenesis discovered 5 new cases of social hybridogenesis in *Cataglyphis* (out  
372 of 11 species tested, Kuhn et al., 2020) and 3 in *Messor* (out of 9, Romiguier et al., 2017). These con-  
siderations, together with our results, support the notion that currently known cases likely represent  
374 only a small fraction of extant eusocial systems relying on hybridization (Helms Cahan et al., 2002;  
Lavanchy and Schwander, 2019).

### 376 **4.3 Factors promoting the evolution of intraspecific worker-loss**

In addition to showing that hybrid vigor is not necessary for the emergence of intraspecific worker-  
378 loss, our model highlights several factors that can facilitate such evolution. The first of these is  
polyandry, which favors sperm parasitism and worker-loss by minimizing the risks associated with  
380 hybridization. Interestingly, even though polyandry is generally rare in social insects (Strassmann,  
2001; Hughes et al., 2008), meaningful exceptions are found in *Pogonomyrmex* (Rheindt et al., 2004)  
382 and *Messor* (Norman et al., 2016) harvester ants, two taxa where social hybridogenesis has evolved  
multiple times (Anderson et al., 2006; Romiguier et al., 2017). While the number of males a queen  
384 mates with is fixed in our model, it is conceivable that this number also responds to hybridization,  
leading polyandry and hybridization to coevolve. Indeed since low levels of polyandry represent a  
386 risk for out-breeding queens, we can expect selection to favour queen behaviours that increase their



number of mates. This would in turn allow for greater levels of hybridization, which would increase  
388 selection on polyandry and so on. We therefore expect that the coevolution between polyandry,  
hybridization, and caste determination further promotes the emergence of worker loss. For species  
390 that are fixed for strict (or close to) monandry, our model shows that worker-loss can evolve when  
queens have the ability to reproduce via thelytokous parthenogenesis as it allows interspecifically  
392 mated queens to nevertheless produce daughter queens. This supports the notion that thelytoky has  
been important for the convergent evolution of social hybridogenesis in the (mostly) monandrous  
394 *Cataglyphis* ants (Kuhn et al., 2020).

Although not considered in our study for simplicity, another factor that can minimize the risks as-  
396 sociated with hybridization in monandrous species is polygyny, whereby related queens form multi-  
queen nests. Such social organization allows both intra- and interspecifically mated queens to be  
398 part of the same colony, which can then produce both queens and workers. Polygyny should there-  
fore further facilitate hybridization. While this may have played a role in the evolution of social  
400 hybridogenesis in the polygynous *Solenopsis* species with this reproductive system (Helms Cahan  
and Keller, 2003; Lacy et al., 2019), we do not expect polygyny to be critical for the evolution of  
402 worker-loss as such loss has been described in both monogynic and polygynic species of the same  
genus (e.g., *Messor barbarus* and cf. *structor*; Romiguier et al., 2017). Beyond these considerations,  
404 any trait (e.g. polyandry, polygyny or reproduction by workers) that influences kinship structure  
within colonies and thus modulates intra-colonial conflicts has the potential to play a role in the  
406 evolution of worker-loss. Studying the evolution of such traits and its feedback on hybridization  
and caste determination therefore represents an interesting avenue for future research.

408 More important for the evolution of worker-loss in our model is that queens hybridize often enough.  
This readily happens when the propensity of queens to mate with allo- vs. con-specific males evolves  
410 (fig. 3). In this case, sperm parasitism, worker-loss and social hybridogenesis emerge even in species  
that initially do not hybridize. Such evolution of hybridization is especially likely to occur where  
412 queens are able to recognize differences among males and choose their mates accordingly. There  
is however currently little, if any, evidence for such direct mate or sperm choice in eusocial insects  
414 (Strassmann, 2001; Schwander et al., 2006; Umphrey, 2006; Feldhaar et al., 2008). Alternatively,  
queens may be able to modulate the degree of hybridization via more indirect mechanisms, such as  
416 mating flight synchronization (Kaspari et al., 2001). Under completely random mating, hybridiza-  
tion can reach sufficient levels for worker-loss to evolve in our model as long as allo-specific males  
418 are sufficiently abundant (fig. 2), for instance because phenology is shared with an ecologically dom-

inant species (Klein et al., 2017). In intermediate situations where allo-specific males are available  
420 but scarce, the evolution of caste determination under random mating leads to a situation where  
queens produce both hybrid and non-hybrid workers (fig. 2A-B). Such a scenario may be relevant to  
422 species of ants where hybrid workers has been reported but where worker-loss has not evolved (e.g.  
in some North American *Solenopsis* or European *Temnothorax*, Feldhaar et al., 2008).

424 Whether it occurs randomly or not, hybridization requires pre-zygotic barriers to be sufficiently low.  
Various mechanisms, such as secondary contacts or high dispersal ability, are known to lower these  
426 barriers (Aguiar et al., 2009). In particular, it has been proposed that the typically low phenotypic  
variation among males of different ant species facilitates hybridization in this taxa (Feldhaar et al.,  
428 2008). With these considerations in mind, it is noteworthy that all known cases of social hybridoge-  
nesis have been found in ants that live in dry climates (Helms Cahan et al., 2002; Helms Cahan and  
430 Keller, 2003; Romiguier et al., 2017; Lacy et al., 2019; Kuhn et al., 2020), where the synchronicity of  
mating flights between species is highest due to shared dependence upon punctual climatic events  
432 (Hölldobler and Wilson, 1990; Feldhaar et al., 2008).

At a broader level, our results suggest that worker-loss can readily evolve when a source of work-  
434 ers that is impervious to royal cheats can be exploited by queens. Besides sperm parasitism, other  
forms of parasitism can provide such a source of workers and have been associated with worker-loss  
436 (Nonacs and Tobin, 1992). In inquiline ants such as *Teleutomyrmex schneideri* for instance, queens  
do not themselves produce workers but rather infiltrate the colony of a host and trick host workers  
438 into caring for their progeny (Hölldobler and Wilson, 1990; Buschinger, 2009). Like in our model,  
such social parasitism could be the endpoint of an arms race between queens and larvae of the same  
440 lineage, whereby increasingly caste-biasing cheats reduce colony workforce leading queens to in-  
creasingly rely on host workers.

#### 442 **4.4 Conclusions**

Intra-colonial conflicts are inevitably part of the social lives of non-clonal organisms. Here we have  
444 shown that such genetic conflicts readily lead to an association between interspecific sperm para-  
sitism and intraspecific worker-loss via the fixation of royal cheats. This association is especially  
446 relevant to the evolution of reproductive systems that like social hybridogenesis rely on hybridiza-  
tion. Beyond these unorthodox systems and sperm parasitism, the fixation of royal cheats and loss  
448 of intraspecific workers may be connected to other forms of antagonistic interspecific relationships



such as social parasitism. More broadly, our model illustrates how the unique genetic conflicts that  
450 are inherent to eusocial life can lead to evolutionary arms races, with implications for elaborate re-  
productive systems and novel ecological interactions between species.

## 452 **Acknowledgements**

We thank Nicolas Galtier for useful discussions, Miya Qiaowei Pan, Laurent Keller and Tanja  
454 Schwander for comments on an earlier version of our manuscript and the Swiss National Science  
Foundation (PCEFP3181243 to CM) for funding.

## 456 **References**

- Abrams, P. A., Y. Harada, and H. Matsuda (1993). On the relationship between quantitative genetic  
458 and ESS models. *Evolution*, 47, 982–985.
- Aguiar, M. de, M. Baranger, E. M. Baptestini, and L. Kaufman (2009). Global patterns of speciation  
460 and diversity. *Nature*, 460, 384–387.
- Alpedrinha, J., A. Gardner, and S. A. West (2014). Haplodiploidy and the evolution of eusociality:  
462 worker revolution. *Am. Nat.*, 184, 303–317.
- Anderson, K. E., J. Gadau, B. M. Mott, R. A. Johnson, A. Altamirano, C. Strehl, et al. (2006). Dis-  
464 tribution and evolution of genetic caste determination in Pogonomyrmex seed-harvester ants.  
*Ecology*, 87, 2171–2184.
- Anderson, K. E., T. A. Linksvayer, and C. R. Smith (2008). The causes and consequences of genetic  
466 caste determination in ants (Hymenoptera : Formicidae). *Myrmecological News*, 11, 119–132.
- 468 Avila, P. and L. Fromhage (2015). No synergy needed: Ecological constraints favor the evolution of  
eusociality. *Am. Nat.*, 186, 31–40.
- 470 Boomsma, J. J. (2009). Lifetime monogamy and the evolution of eusociality. *Philos. Trans. R. Soc. B  
Biol. Sci.*, 364, 3191–3207.
- 472 Bourke, A. F. G. and G. L. Chan (1999). Queen-worker conflict over sexual production and colony  
maintenance in perennial social insects. *Am. Nat.*, 154, 417–426.
- 474 Brännström, A., J. Johansson, and N. Von Festenberg (2013). The Hitchhiker’s Guide to Adaptive  
Dynamics. *Games*, 4, 304–328.
- 476 Brian, M. V. (1956). Studies of caste differentiation in *Myrmica Rubra* L. 4. controlled larval nutrition.  
*Insectes Soc.*, 3, 369–394.

- 478 Brian, M. V. (1973). Temperature choice and its relevance to brood survival and caste determination  
in the ant *myrmica rubra* L. *Physiol. Zoölogy*, 46, 245–252.
- 480 — (1974). Caste differentiation in *Myrmica rubra*: the role of hormones. *J. Insect Physiol.*, 20, 1351–  
1365.
- 482 Buschinger, A. (2009). Social parasitism among ants : a review (Hymenoptera :Formicidae). *Myrme-*  
*cological News*, 12, 219–235.
- 484 Caswell, H. (2000). *Matrix population models*. Sinauer Associates, Inc, Sunderland, Massachusetts,  
pp. 1–713.
- 486 Charlesworth, B. (1990). Optimization models, quantitative genetics, and mutation. *Evolution*, 44,  
520–538.
- 488 Crespi, B. J. and D. Yanega (1995). The definition of eusociality. *Behav. Ecol.*, 6, 109–115.
- Darwin, C. (1859). *No Title*. J. Murray, London, UK, pp. 1–230.
- 490 Dercole, F. and S. Rinaldi (2008). *Analysis of evolutionary processes: The adaptive dynamics approach*  
*and its applications*. Princeton Univ. Press, Princeton, New Jersey, pp. 1–360.
- 492 Dobata, S. (2012). Arms race between selfishness and policing: two-trait quantitative genetic model  
for caste fate conflict in eusocial hymenoptera. *Evolution*, 66, 3754–3764.
- 494 Douwes, P. and B. Stille (1991). Hybridization and variation in the *Leptothorax tuborum* group (Hy-  
menoptera: Formicidae). *Z. Zool. Syst. Evol.*, 29, 165–175.
- 496 Feldhaar, H., S. Foitzik, and J. Heinze (2008). Lifelong commitment to the wrong partner: hybridiza-  
tion in ants. *Philos. Trans. R. Soc. B Biol. Sci.*, 363, 2891–2899.
- 498 Field, J. and H. Toyozumi (2020). The evolution of eusociality : no risk-return tradeoff but the ecol-  
ogy matters. *Ecol. Lett.*, 23, 518–526.
- 500 Fournier, D., A. Estoup, J. Orivel, J. Foucaud, H. Jourdan, J. Le Breton, et al. (2005). Clonal repro-  
duction by males and females in the little fire ant. *Nature*, 435, 1230–1234.
- 502 Frank, S. A. (1998). *Foundations of social evolution*. Princeton University Press, Princeton, New Jer-  
sey, pp. 1–268.
- 504 Frohshammer, S. and J. Heinze (2009). A heritable component in sex ratio and caste determination  
in a *Cardiocondyla* ant. *Front. Zool.*, 6, 1–6.
- 506 Geritz, S. A. H. and M. Gyllenberg (2005). Seven answers from adaptive dynamics. *J. Evol. Biol.*, 18,  
1174–1177.
- 508 Geritz, S. A. H., E. Kisdi, G. Meszéna, and J. A. J. Metz (1998). Evolutionarily singular strategies and  
the adaptive growth and branching of the evolutionary tree. *Evol. Ecol.*, 12, 35–57.

- 510 Geritz, S. A. H., J. A. J. Metz, and C. Rueffler (2016). Mutual invadability near evolutionarily singular  
strategies for multivariate traits, with special reference to the strongly convergence stable case.  
512 *J. Math. Biol.*, 72, 1081–1099.
- González-Forero, M. (2015). Stable eusociality via maternal manipulation when resistance is cost-  
514 less. *J. Evol. Biol.*, 28, 2208–2223.
- Hamilton, W. D. (1964). The genetical evolution of social behaviour . I. *J. Theor. Biol.*, 7, 1–16.
- 516 Hartfelder, K., G. R. Makert, C. C. Judice, G. A. G. Pereira, W. C. Santana, R. Dallacqua, et al. (2006).  
Physiological and genetic mechanisms underlying caste development, reproduction and division  
518 of labor in stingless bees. *Apidologie*, 37, 144–163.
- Helms Cahan, S. and L. Keller (2003). Complex origin of a genetic system of caste determination in  
520 harvester ants. *Nature*, 424, 306–309.
- Helms Cahan, S., J. D. Parker, S. W. Rissing, R. A. Johnson, T. S. Polony, M. D. Weiser, et al. (2002).  
522 Extreme genetic differences between queens and workers in hybridizing Pogonomyrmex har-  
vester ants. *Proc. R. Soc.*, 269, 1871–1877.
- 524 Hölldobler, B. and E. O. Wilson (1990). *The ants*. Harvard Univ. Press, Cambridge, Massachusetts,  
pp. 1–732.
- 526 Hughes, W. O. H., B. P. Oldroyd, M. Beekman, and F. L. W. Ratnieks (2008). Ancestral monogamy  
shows kin selection is key to the evolution of eusociality. *Science*, 320, 1213–1216.
- 528 Hughes, W. O. H. and J. J. Boomsma (2008). Genetic royal cheats in leaf-cutting ant societies. *Proc.*  
*Natl. Acad. Sci.*, 105.
- 530 Iwasa, Y., A. Pomiankowski, and S. Nee (1991). The evolution of costly mate preferences. II. The  
“handicap” principle. *Evolution*, 45, 1431–1442.
- 532 James, S. S., R. M. Pereira, K. M. Vail, and B. H. Ownley (2002). Survival of imported fire Ant (Hy-  
menoptera: Formicidae) species subjected to freezing and near-freezing temperatures. *Environ.*  
534 *Entomol.*, 31, 127–133.
- Julian, G. E. and S. H. Cahan (2006). Behavioral differences between Pogonomyrmex rugosus and  
536 dependent lineages (H1/H2) harvester ants. *Ecology*, 87, 2207–2214.
- Kaspari, M., J. Pickering, J. T. Longino, and D. Windsor (2001). The phenology of a neotropical ant  
538 assemblage: evidence for continuous and overlapping reproduction. *Behav. Ecol. Sociobiol.*, 50,  
382–390.
- 540 Klein, E. K., L. Lagache-Navarro, and R. J. Petit (2017). Demographic and spatial determinants of  
hybridization rate. *J. Ecol.*, 105, 29–38.

- 542 Kuhn, A., H. Darras, O. Paknia, and S. Aron (2020). Repeated evolution of queen parthenogenesis  
and social hybridogenesis in Cataglyphis desert ants. *Mol. Ecol.*, 29, 549–564.
- 544 Lacy, K. D., D. Shoemaker, and K. G. Ross (2019). Joint Evolution of Asexuality and Queen Number  
in an Ant. *Curr. Biol.*, 29, 1394–1400.
- 546 Lavanchy, G. and T. Schwander (2019). Hybridogenesis. *Curr. Biol.*, 29, R1–R15.
- Lehmann, L., C. Mullon, E. Akçay, and J. V. Cleve (2016). Invasion fitness, inclusive fitness, and  
548 reproductive numbers in heterogeneous populations. *Evolution*, 70, 1689–1702.
- Lehmann, L., V. Ravnigne, and L. Keller (2008). Population viscosity can promote the evolution of  
550 altruistic sterile helpers and eusociality. *Proc. R. Soc. B Biol. Sci.*, 275, 1887–1895.
- Leimar, O. (2009). Multidimensional convergence stability. *Evol. Ecol. Res.*, 11, 191–208.
- 552 Libbrecht, R., M. Corona, F. Wende, D. O. Azevedo, J. E. Serrão, and L. Keller (2013). Interplay  
between insulin signaling , juvenile hormone , and vitellogenin regulates maternal effects on  
554 polyphenism in ants. *Proc. Natl. Acad. Sci.*, 110, 11050–11055.
- Linksvayer, T. A. (2006). Direct, maternal and sibsocial genetic effects on individual and colony traits  
556 in an ant. *Evolution*, 60, 2552–2561.
- Maroja, L. S., Z. M. Mckenzie, E. Hart, J. Jing, E. L. Larson, and D. P. Richardson (2014). Barriers  
558 to gene exchange in hybridizing field crickets : the role of male courtship effort and cuticular  
hydrocarbons. *BMC Evol. Biol.*, 14, 1–10.
- 560 Moritz, R. F. A., H. M. G. Lattorff, P. Neumann, F. B. Kraus, S. E. Radloff, and H. R. Hepburn (2005).  
Rare royal families in honeybees, *Apis mellifera*. *Naturwissenschaften*, 92, 488–491.
- 562 Mullon, C., L. Keller, and L. Lehmann (2018). Social polymorphism is favoured by the co-evolution  
of dispersal with social behaviour. *Nat. Ecol. Evol.*, 2, 132–140.
- 564 Nonacs, P. and J. E. Tobin (1992). Selfish larvae: Development and the evolution of parasitic behavior  
in the Hymenoptera. *Evolution*, 46, 1605–1620.
- 566 Norman, V., H. Darras, C. Tranter, S. Aron, and W. O. H. Hughes (2016). Cryptic lineages hybridize  
for worker production in the harvester ant *Messor barbarus*. *Biol. Lett.*, 12, 1–5.
- 568 Ohkawara, K., M. Nakayama, A. Satoh, A. Trindl, and J. Heinze (2006). Clonal reproduction and  
genetic caste differences in a queen-polymorphic ant , *Vollenhovia emeryi*. *Biol. Lett.*, 5, 359–  
570 363.
- Parker, G. A. and J. Maynard Smith (1990). Optimality theory in evolutionary biology. *Nature*, 348,  
572 27–33.
- Pearcy, M., M. A. D. Goodisman, and L. Keller (2011). Sib mating without inbreeding in the longhorn  
574 crazy ant. *Proc. R. Soc.*, 278, 2677–2681.

- Penick, C. A. and J. Liebig (2012). Regulation of queen development through worker aggression in  
576 a predatory ant. *Behav. Ecol.*, 992–998.
- Penick, C. A., S. S. Prager, and J. Liebig (2012). Juvenile hormone induces queen development in  
578 late-stage larvae of the ant *Harpegnathos saltator*. *J. Insect Physiol.*, 58, 1643–1649.
- Phillips, P. and S. J. Arnold (1989). Visualizing multivariate selection. *Evolution*, 43, 1209–1222.
- 580 Queller, D. C. (1994). Extended parental care and the origin of eusociality. *Proc. R. Soc. B Biol. Sci.*,  
256, 105–111.
- 582 Quiñones, A. E. and I. Pen (2017). A unified model of Hymenopteran preadaptations. *Nat. Commun.*,  
8, 1–13.
- 584 Rabeling, C. and D. J. C. Kronauer (2013). Thelytokous parthenogenesis in eusocial hymenoptera.  
*Annu. Rev. Entomol.*, 58, 273–292.
- 586 Reuter, M. and L. Keller (2001). Sex ratio conflict and worker production in eusocial Hymenoptera.  
*Am. Nat.*, 158, 166–177.
- 588 Rey, O., B. Facon, J. Foucaud, A. Loiseau, and A. Estoup (2013). Androgenesis is a maternal trait in  
the invasive ant *Wasmannia auropunctata*. *Proc. R. Soc. B Biol. Sci.*, 280, 1–7.
- 590 Rheindt, F. E., J. Gadau, C.-P. Strehl, and B. Hölldobler (2004). Extremely high mating frequency in  
the Florida harvester ant (*Pogonomyrmex badius*). *Behav. Ecol. Sociobiol.*, 56, 472–481.
- 592 Robertson, J. L. and K. G. Ross (1990). Developmental stability, heterozygosity, and fitness in two  
introduced fire ants (*Solenopsis invicta* and *S. richteri*) and their hybrid. *Heredity*, 64, 93–103.
- 594 Romiguier, J., A. Fournier, S. H. Yek, and L. Keller (2017). Convergent evolution of social hybridogen-  
esis in Messor harvester ants. *Mol. Ecol.*, 26, 1108–1117.
- 596 Rousset, F. and O. Ronce (2004). Inclusive fitness for traits affecting metapopulation demography.  
*Theoretical Population Biology*, 65, 127–141.
- 598 Rousset, F. (2004). *Genetic structure and selection in subdivided populations*, pp. 1–288.
- Schwander, T., S. H. Cahan, and L. Keller (2006). Genetic caste determination in *Pogonomyrmex*  
600 harvester ants imposes costs during colony founding. *J. Evol. Biol.*, 19, 402–409.
- Schwander, T., J.-y. Humbert, C. S. Brent, S. H. Cahan, L. Chapuis, E. Renai, et al. (2008). Maternal  
602 effect on female caste determination in a social insect. *Curr. Biol.*, 18, 265–269.
- Schwander, T. and L. Keller (2008). Genetic compatibility affects queen and worker caste determi-  
604 nation. *Science*, 322, 552.
- Schwander, T., N. Lo, M. Beekman, B. P. Oldroyd, and L. Keller (2010). Nature versus nurture in  
606 social insect caste differentiation. *Trends Ecol. Evol.*, 25, 275–282.
- Seger, J. (1981). Kinship and covariance. *J. Theor. Biol.*, 91, 191–213.

- 608 Seger, J. (1983). Partial bivoltinism may cause alternating sex-ratio biases that favour eusociality.  
*Nature*, 301, 59–62.
- 610 Smith, C. R., K. E. Anderson, C. V. Tillberg, J. Gadau, and A. V. Suarez (2008). Caste determination  
in a polymorphic social insect: nutritional, social, and genetic factors. *Am. Nat.*, 172, 497–507.
- 612 Strassmann, J. (2001). The rarity of multiple mating by females in the social Hymenoptera. *Insectes  
Soc.*, 48, 1–13.
- 614 Taylor, P. D. and S. A. Frank (1996). How to make a kin selection model. *J. Theor. Biol.*, 180, 27–37.
- Trible, W. and D. J. C. Kronauer (2017). Caste development and evolution in ants : it’s all about size.  
616 *Co. Biol.*, 53, 53–62.
- Trivers, L. R. and H. Hare (1976). Haplodiploidy and the evolution of the social insects. *Science*, 191,  
618 249–263.
- Umphrey, G. J. (2006). Sperm parasitism in ants: selection for interspecific mating and hybridization.  
620 *Ecology*, 87, 2148–2159.
- Wenseleers, T., A. G. Hart, and F. L. W. Ratnieks (2004). When resistance is useless : policing and  
622 the evolution of reproductive acquiescence in insect societies. *Am. Nat.*, 164, E154–E167.
- Winter, U. and A. Buschinger (1986). Genetically mediated queen polymorphism and caste determi-  
624 nation in the slave-making ant, *Harpagoxenus sublaevis* (Hymenoptera: Formicidae). *Entomol.  
Gen.*, 11, 125–137.
- 626 Wolf, J. I., P. Punttila, and P. Seppä (2018). Life-history trait variation in a queen-size dimorphic ant.  
*Ecol. Entomol.*, 1–11.
- 628 Wolfram Research, I. (2020). *Mathematica*. Champaign, Illinois.

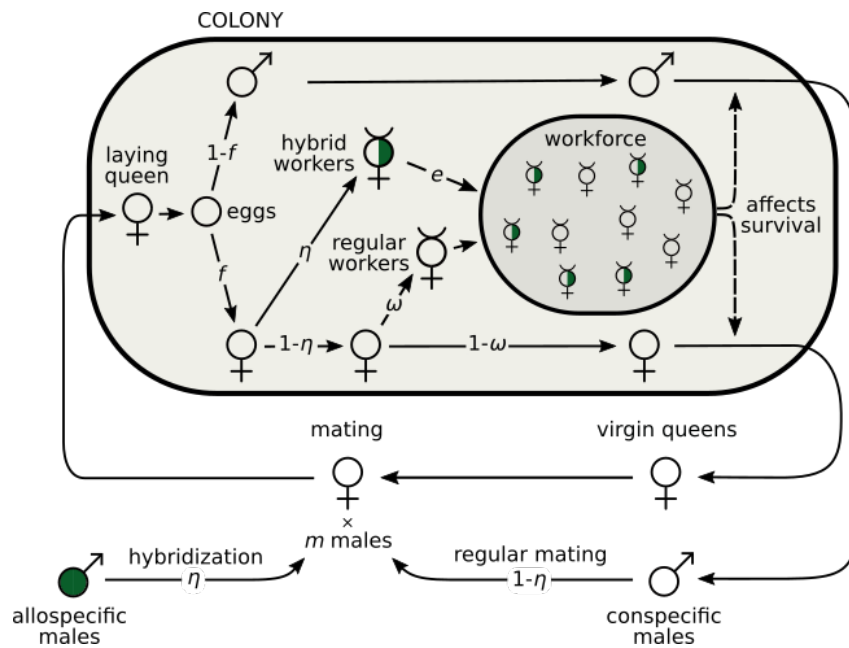

**Figure 1: The life cycle of an annual eusocial with hybridization and sperm parasitism.** At each generation, the life-cycle begins with virgin queens mating with  $m$  males, each of which has a probability  $\eta$  to be allospecific and  $1-\eta$  to be conspecific. After mating, a queen founds a colony and starts producing eggs. Hybrid female eggs (with allospecific paternal origin) all develop into workers. Regular female eggs (with conspecific paternal origin) develop into workers with probability  $\omega$  and into queens otherwise. The variable  $\eta$  thus captures the tendency of queens to hybridize and parasitize sperm, while  $\omega$  controls caste determination.

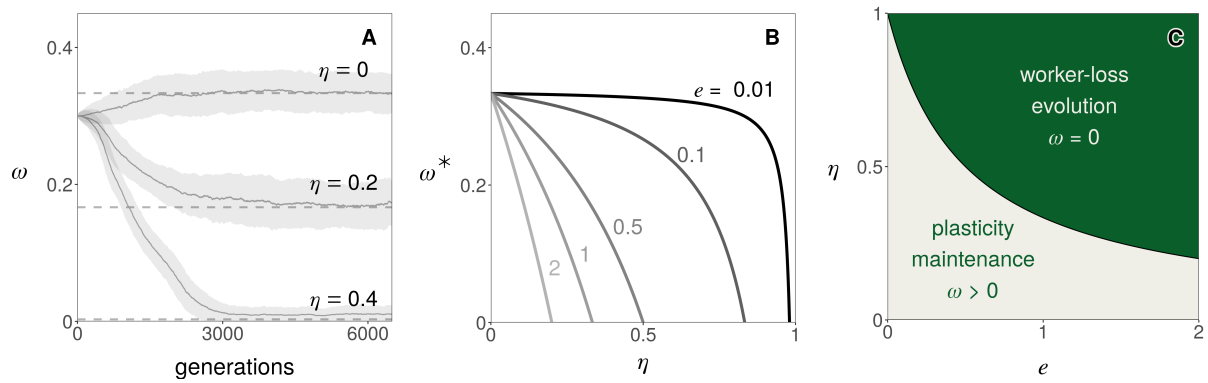

**Figure 2: The fixation of royal cheats and evolution of intraspecific worker-loss.**

**A** Evolution of the probability  $\omega$  that a female larva develops into a worker in a simulated population when queens mate with a large number of males (polyandry,  $m \rightarrow \infty$ ) and the proportion of allospecific males  $\eta$  is fixed (top  $\eta = 0$ ; middle  $\eta = 0.2$ , bottom  $\eta = 0.4$ ; other parameters:  $e = 1$ , Appendix A.3 for details on simulations). Plain lines (and surrounding grey areas) show the population average  $\omega$  (and its standard deviation). Dashed lines show the predicted equilibrium (from eq. 1). **B** Equilibrium of  $\omega$  as a function of hybridization  $\eta$  and the efficiency of hybrid workers  $e$  (from eq. 1). **C** Parameter combinations leading to the evolution of complete worker-loss (i.e.  $\omega \rightarrow 0$ , in green, corresponding to  $\eta \geq 1/(1+2e)$  which is found by substituting eq. 1 into  $\omega^* \leq 0$ ).



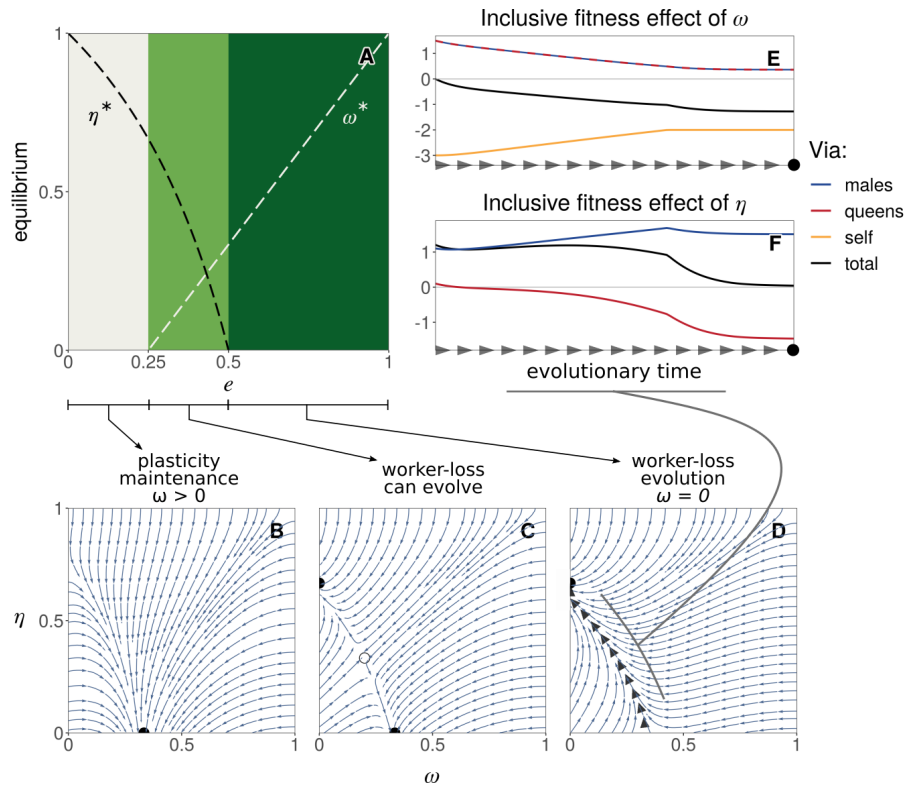

**Figure 3: The coevolution of caste determination and sperm parasitism.** **A.** Evolutionary equilibria (for  $\eta$  in black and  $\omega$  in white) as a function of hybrid worker efficiency  $e$  (eq. B-6 in Appendix B.1.2 for details). These equilibria however are evolutionary repellers (eq. B-7 in Appendix B.1.2). As a result, three types of coevolutionary dynamics are possible depending on  $e$  as illustrated in panels B, C & D (from eq. B-5). These panels show examples of phenotypic trajectories when worker-loss: **B** never evolves ( $e = 0.1$ ); **C** can evolve depending on initial conditions ( $e = 0.4$ ); **D** always evolves ( $e = 0.7$ ). Black filled circles indicate the two evolutionary end-points: hybridization avoidance with developmental plasticity ( $\omega = 1/3$  and  $\eta = 0$  in B-C) or worker-loss with hybridization ( $\omega = 0$  and  $\eta = 2/3$  in C-D). Empty circle in C shows the internal unstable equilibrium (eq. B-6). Thick grey arrow heads in D represent the trajectory of a population starting from  $\omega = 1/3$  and  $\eta = 0$  and evolving to worker-loss. **E:** Fitness effects of caste determination  $\omega$  in a mutant larva via itself (in orange), related queens (red) and related males (blue) along the trajectory leading to worker-loss shown in panel D (total selection in black, Appendix B.1.3 for derivation). We see that negative fitness effects via self (orange line) lead to a total selection effect that is negative (black line). This indicates that mutant larvae with increasingly small values of  $\omega$  are selected because these values increase larvae's direct fitness (by increasing the probability that they develop into queens). **F:** Fitness effects of hybridization  $\eta$  in a mutant queen, via its sons (blue) and daughter queens (red) along the trajectory leading to worker-loss shown in panel D (total selection in black). Positive total selection (in black) is mostly due to an increase of fitness via males (in blue). This says that mutant queens with increasingly large values of  $\eta$  are selected because this increases their reproduction, especially via males.

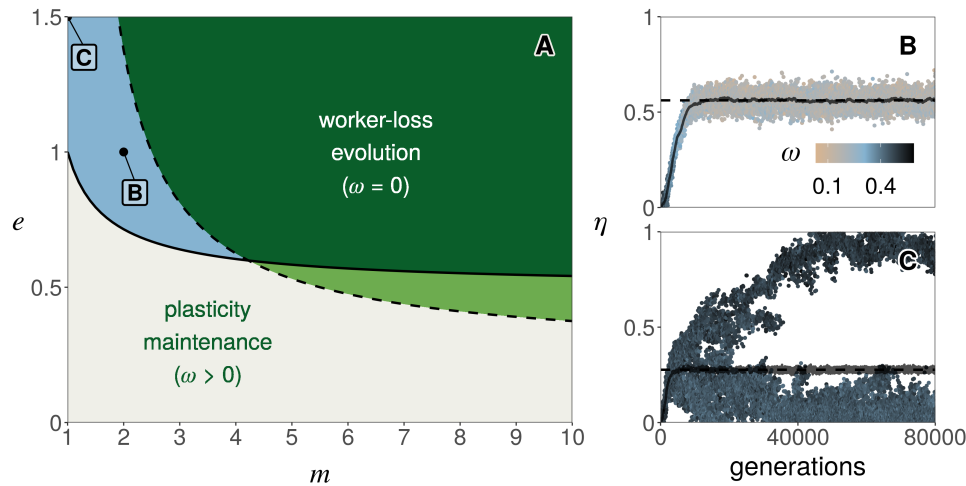

**Figure 4: The effects of monandry and low polyandry.** **A:** Outcome of selection as a function of mate number  $m$  and hybrid worker efficiency  $e$ . Over the dashed line, worker-loss is a stable equilibrium (i.e. a population with traits  $\omega = 0$  and  $\eta = 2/3$  cannot be invaded, eq. B-16 in Appendix B.2.1). Over the plain line, hybridization can invade when rare (i.e.  $\eta = 0$  is unstable, eq. B-18 in Appendix B.2.1). Below both lines (gray region), plasticity in caste determination is maintained (as in fig. 3B). Over both lines (dark green region), hybridization and worker-loss evolve (as in fig. 3D). In the light green region, worker-loss evolve for some initial conditions (as in fig. 3C). In the blue region, there exists an internal attractor equilibrium (i.e. the population converges towards a phenotype  $0 < \eta^* < 1$  and  $0 < \omega^* < 1$ ) that is either uninvadable (for  $2 \leq m \leq 4$ , panel B for e.g.) or invadable leading to polymorphism (for  $m = 1$ , panel C for e.g.). **B:** Evolution towards an uninvadable phenotype in a simulated population (when  $e = 1$  and  $m = 2$ ). Each dot represents the value of  $\eta$  of one of 20 haplotypes randomly sampled every 100 generation in a simulated population of 10000 queens (Appendix A.3 for details on simulations). The colour of each dot gives the value of  $\omega$  of the associated haplotype (legend). The horizontal dashed line represents the predicted equilibrium (from fig. S1). The grey line represents the mean value of  $\eta$  across the simulation. **C:** Evolution towards an invadable phenotype and the emergence of polymorphism in a simulated population (when  $e = 1.5$  and  $m = 1$ , other parameters and figure legend: same as B).

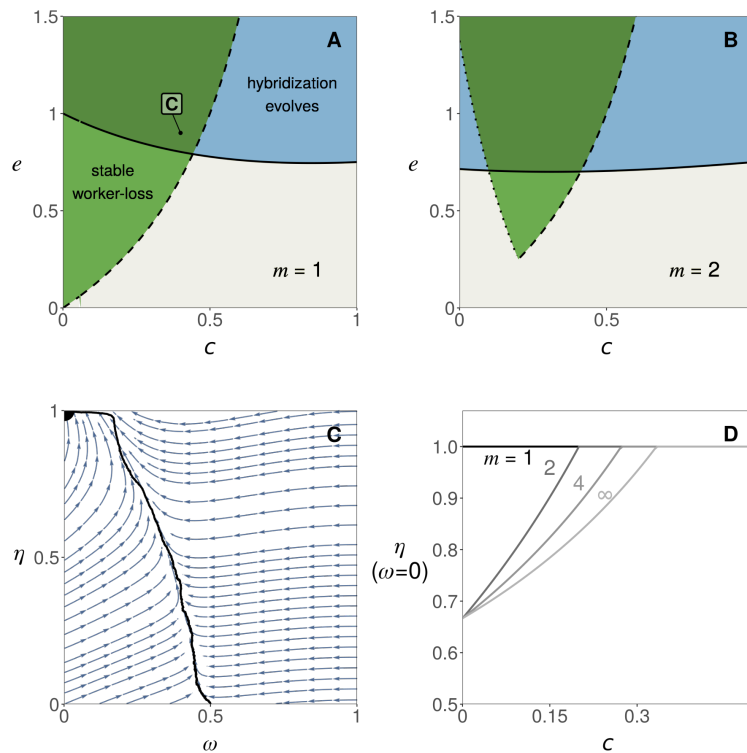

**Figure 5: The influence of thelytokous parthenogenesis.** **A & B** Invasion analysis as a function of parthenogenesis  $c$  and hybrid worker efficiency  $e$  (with  $m = 1$  in **A** and  $m = 2$  in **B**). In the region over the plain line, hybridization can invade when rare (i.e.  $\eta = 0$  is unstable, eq. B-23). In the region over the dashed line (in **A**) or framed by the dotted and dashed lines (in **B**), worker-loss is a stable equilibrium (i.e. a population at equilibrium for  $\eta$  and with  $\omega = 0$  cannot be invaded, Appendix B.2.2, eqs. B-25 and B-26 for details). In the dark green region, selection thus favours both the evolution of hybridization and the maintenance of worker-loss (e.g. panel **C**). In the light green region, worker-loss can evolve only for some initial conditions (as in fig. 3C). **C** Phenotypic trajectories leading to worker-loss (when  $e = 0.9$ ,  $c = 0.4$  and  $m = 1$ ). Arrows show the direction of evolution favoured by selection. Black filled circles indicate the evolutionary end-point. The black line shows the average trait values of a simulated population starting at  $(\omega = 1/2, \eta = 0)$ . In this example, selection leads to a state where worker-loss ( $\omega = 0$ ) is coupled with complete hybridization ( $\eta = 1$ ). **D** Level of hybridization  $\eta$  favoured by selection when worker-loss has evolved ( $\omega = 0$ ) as a function of parthenogenesis  $c$ . This shows that worker-loss is always associated to complete hybridization ( $\eta = 1$ ) under monandry ( $m = 1$ ) and if  $c \geq (m - 1)/(3m - 1)$  under polyandry ( $m > 1$ ) (Appendix B.2.2, eq. B-24, for details).

# Appendices

## 630 **A Methods**

Here we describe our methods to investigate the evolutionary dynamics of: (1) the probability  $\omega$  for  
632 a non-hybrid larvae to develop as a worker; and (2) the propensity  $\eta$  for queens to hybridize. These  
methods are organised as follows. First in section A.1, we present a population genetics model that  
634 describes the change in allele frequencies at a biallelic locus that determines the value of  $\omega$  in larvae  
and of  $\eta$  in queens. Second (in section A.2.1), we obtain the invasion fitness of a mutant allele  
636 coding for deviant trait values in a population otherwise monomorphic for a resident allele. Then,  
we use this invasion fitness in section A.2 as a platform to infer the long-term adaptive dynamics  
638 of both traits (i.e. their gradual evolution under the input of rare mutations with weak phenotypic  
effects). Specifically, we derive the joint evolutionary equilibria of  $\omega$  and  $\eta$  (i.e. singular values), as  
640 well as their properties (i.e. convergence stability and evolutionary stability, Dercole and Rinaldi,  
2008 for textbook treatment). Finally in section A.3, we describe our individual-based simulations.  
642 A Mathematica notebook reproducing our analyses and figures is provided as a supplement here:  
<https://zenodo.org/record/4434257>.

### 644 **A.1 Short term evolution: population genetics**

#### **A.1.1 Set-up**

646 We consider a single locus with two alleles,  $a$  and  $b$ , that affect the expression of both  $\omega$  and  $\eta$  in  
their carrier. Specifically, the probability for a larva with genotype  $v \in \{aa, ab, bb\}$  to develop as  
648 a worker is  $\omega_v$ , while each mate of a queen with genotype  $v \in \{aa, ab, bb\}$  is allospecific with a  
probability  $\eta_v$ . To track the segregation of alleles  $a$  and  $b$  in the population, we let  $p_{aa}^{\circ}(t)$ ,  $p_{bb}^{\circ}(t)$ , and  
650  $p_{ab}^{\circ}(t)$  respectively denote the proportion of queens with genotype  $aa$ ,  $bb$  and  $ab$  before mating at  
generation  $t$  (with  $p_{aa}^{\circ}(t) + p_{bb}^{\circ}(t) + p_{ab}^{\circ}(t) = 1$ ). Similarly,  $p_a^{\delta}(t)$  and  $p_b^{\delta}(t)$  respectively denote the  
652 proportion of conspecific males with haploid genotype  $a$  and  $b$  before mating at generation  $t$  (with  
 $p_a^{\delta}(t) + p_b^{\delta}(t) = 1$ ).

### 654 A.1.2 Recurrence equations for the evolution of genotype frequencies

Our first goal is to develop recurrence equations for the frequencies of each genotype in males and  
 656 females (i.e. express  $p_u^\delta(t+1)$  and  $p_v^\varnothing(t+1)$  in terms of  $p_u^\delta(t)$  and  $p_v^\varnothing(t)$  for  $u \in \{a, b\}$  and  $v \in \{aa, ab, bb\}$ ). By definition, these frequencies can be written as

$$\begin{aligned} p_u^\delta(t+1) &= \frac{n_u^\delta(t+1)}{n_a^\delta(t+1) + n_b^\delta(t+1)} \\ p_v^\varnothing(t+1) &= \frac{n_v^\varnothing(t+1)}{n_{aa}^\varnothing(t+1) + n_{ab}^\varnothing(t+1) + n_{bb}^\varnothing(t+1)}, \end{aligned} \quad (\text{A-1})$$

658 where  $n_u^\delta(t+1)$  is the number of males of genotype  $u \in \{a, b\}$  at generation  $t+1$ , and  $n_v^\varnothing(t+1)$  the  
 number of queens of genotype  $v \in \{aa, ab, bb\}$  at generation  $t+1$  in the mating pool. Under our  
 660 assumption that the probability for a sexual to reach the mating pool increases with the workforce  
 of a colony (section 2 in main text), the numbers of males and females of each genotype can be  
 662 expressed as:

$$\begin{aligned} n_v^\delta(t+1) &= x_{aa \rightarrow v}^\delta(t) n_{aa}^\varnothing(t) p_{aa}^\varnothing(t) + x_{ab \rightarrow v}^\delta(t) n_{ab}^\varnothing(t) p_{ab}^\varnothing(t) + x_{bb \rightarrow v}^\delta(t) n_{bb}^\varnothing(t) p_{bb}^\varnothing(t) \\ n_v^\varnothing(t+1) &= x_{aa \rightarrow v}^\varnothing(t) n_{aa}^\varnothing(t) p_{aa}^\varnothing(t) + x_{ab \rightarrow v}^\varnothing(t) n_{ab}^\varnothing(t) p_{ab}^\varnothing(t) + x_{bb \rightarrow v}^\varnothing(t) n_{bb}^\varnothing(t) p_{bb}^\varnothing(t), \end{aligned} \quad (\text{A-2a})$$

where  $x_{u \rightarrow v}^\delta(t)$  is the number of males with genotype  $v \in \{a, b\}$ , and  $x_{u \rightarrow v}^\varnothing(t)$  the number of queens  
 664 with genotype  $v \in \{aa, ab, bb\}$ , produced by a colony founded by a queen of genotype  $u \in \{aa, ab, bb\}$   
 at generation  $t$ . Following Reuter and Keller (2001), we assume that these numbers are  
 666 proportional to the energy invested into the production of sexuals. So instead of numbers,  $x_{u \rightarrow v}^\delta(t)$   
 can be viewed as the investment into the production of males (of genotype  $v \in \{a, b\}$ ) and  $x_{u \rightarrow v}^\varnothing(t)$   
 668 into the production of queens (of genotype  $v \in \{aa, ab, bb\}$ ) by a colony whose queen has genotype  
 $u \in \{aa, ab, bb\}$ . Finally,  $n_u^\varnothing(t)$  is the effective workforce of a colony whose queen has genotype  
 670  $u \in \{aa, ab, bb\}$  at generation  $t$ . This effective workforce is given by the sum of all types of workers  
 present in a colony, including hybrids (with the latter weighted by their efficiency  $e$ ), i.e.

$$n_u^\varnothing(t) = \left( x_{u \rightarrow aa}^\varnothing(t) + x_{u \rightarrow ab}^\varnothing(t) + x_{u \rightarrow bb}^\varnothing(t) + e x_{u \rightarrow hyb}^\varnothing(t) \right)^\alpha \quad (\text{A-2b})$$

672 where  $x_{u \rightarrow v}^\varnothing(t)$  is the investment into the production of workers of genotype  $v \in \{aa, ab, bb, hyb\}$   
 (with  $hyb$  denoting hybrid genotype) made by a colony whose queen has genotype  $u \in \{aa, ab, bb\}$   
 674 at generation  $t$ . The parameter  $\alpha > 0$  determines the effect of the workforce on the probability for a

sexual to reach the mating pool. When  $\alpha = 1$ , investment in workers affects the survival of queens  
 676 and males linearly (i.e. one extra unit of workforce always increases survival by the same amount).  
 By contrast when  $\alpha < 1$ , investment in workers show diminishing returns. Conversely when  $\alpha > 1$ ,  
 678 investment in workers show increasing returns. For most of our analyses, we assume linear effects  
 of the workforce ( $\alpha = 1$ ). We relax this assumption in section B.2.3.

680 We specify the investments into males,  $x_{u \rightarrow v}^{\delta}(t)$ , queens,  $x_{u \rightarrow v}^{\phi}(t)$ , and workers,  $x_{u \rightarrow v}^{\chi}(t)$ , in terms of  
 model parameters in Table S1. For the sake of completeness, we do so for a model that encompasses  
 682 all the effects explored sequentially in the main text, i.e. we allow for both traits  $\omega$  and  $\eta$  to coevolve;  
 for a finite number  $m$  of mates for each queen; and for a fraction  $c$  of a queen's brood to be produced  
 684 via parthenogenesis. To read Table S1, note that the different investments made by a colony with a  
 queen of type  $u \in \{aa, ab, bb\}$  (i.e.  $x_{u \rightarrow v}^{\delta}(t)$ ,  $x_{u \rightarrow v}^{\phi}(t)$ , and  $x_{u \rightarrow v}^{\chi}(t)$ ) depend on the types of males she has  
 686 mated with. To capture this, we let  $M_{u,v}$  be the random number of males of genotype  $v \in \{a, b, h\}$   
 (where  $h$  denotes allospecific type) that a queen of genotype  $u \in \{aa, ab, bb\}$  mates with. Assum-  
 688 ing that each mate is independent from one another, these random variables follow a multinomial  
 distribution with parameters,

$$M_u = (M_{u,a}, M_{u,b}, M_{u,h}) \sim \text{Multinomial}\left(m, (1 - \eta_u)p_a^{\delta}(t), (1 - \eta_u)p_b^{\delta}(t), \eta_u\right), \quad (\text{A-3})$$

690 where  $m$  is the total number of mates;  $(1 - \eta_u)p_v^{\delta}(t)$  is the probability that in one mating event a  
 queen of type  $u$  mates with a conspecific male of type  $v \in \{a, b\}$  (which requires that this queen  
 692 does not hybridize, with probability  $(1 - \eta_u)$ , and encounters a male of type  $v$ , with probability given  
 by its proportion,  $p_v^{\delta}(t)$ ); and  $\eta_u$  is the probability that in one mating event a queen of type  $u$  mates  
 694 with an allospecific male.

To get to the recurrence equations tracking the proportion of males and queens of each genotype,  
 696 we first substitute the entries of Table S1 into eq. (A-2) (with  $\alpha = 1$ ). Doing so we obtain polyno-  
 mials for the numbers  $n_v^{\delta}(t + 1)$  (for  $v \in \{a, b\}$ ) and  $n_v^{\phi}(t + 1)$  (for  $v \in \{aa, ab, bb\}$ ) in terms of  
 698 the random variables  $M_{u,a}$ ,  $M_{u,b}$ , and  $M_{u,h}$  (with  $u \in \{aa, ab, bb\}$ ). We marginalise (i.e. take the  
 expectation of) these polynomials over the joint probability mass function of  $M_{u,a}$ ,  $M_{u,b}$ , and  $M_{u,h}$   
 700 for each  $u \in \{aa, ab, bb\}$ , which is given by eq. (A-3). Finally, the so-obtained numbers of different  
 types of individuals (eq. A-2) are substituted into eq. (A-1). From this operation and using the fact

| Investment |      | Queen                                                                                      |                                                                                                                   |                                                                                            |
|------------|------|--------------------------------------------------------------------------------------------|-------------------------------------------------------------------------------------------------------------------|--------------------------------------------------------------------------------------------|
| caste      | type | aa                                                                                         | ab                                                                                                                | bb                                                                                         |
| males      | a    | $x_{aa+aa}^{\delta}(t) = (1-f)$                                                            | $x_{ab+aa}^{\delta}(t) = \frac{1}{2}(1-f)$                                                                        | $x_{bb+aa}^{\delta}(t) = 0$                                                                |
|            | b    | $x_{aa+ab}^{\delta}(t) = 0$                                                                | $x_{ab+ab}^{\delta}(t) = \frac{1}{2}(1-f)$                                                                        | $x_{bb+ab}^{\delta}(t) = (1-f)$                                                            |
| queens     | aa   | $x_{aa+aa}^{\varphi}(t) = f \left( c + (1-c) \frac{M_{aa,a}}{m} \right) (1 - \omega_{aa})$ | $x_{ab+aa}^{\varphi}(t) = f(1-c) \frac{1}{2} \frac{M_{ab,a}}{m} (1 - \omega_{aa})$                                | $x_{bb+aa}^{\varphi}(t) = 0$                                                               |
|            | ab   | $x_{aa+ab}^{\varphi}(t) = f(1-c) \frac{M_{aa,b}}{m} (1 - \omega_{ab})$                     | $x_{ab+ab}^{\varphi}(t) = f \left( c + (1-c) \frac{1}{2} \frac{M_{ab,a} + M_{ab,b}}{m} \right) (1 - \omega_{ab})$ | $x_{bb+ab}^{\varphi}(t) = f(1-c) \frac{M_{bb,a}}{m} (1 - \omega_{ab})$                     |
|            | bb   | $x_{aa+bb}^{\varphi}(t) = 0$                                                               | $x_{ab+bb}^{\varphi}(t) = f(1-c) \frac{1}{2} \frac{M_{ab,b}}{m} (1 - \omega_{bb})$                                | $x_{bb+bb}^{\varphi}(t) = f \left( c + (1-c) \frac{M_{bb,b}}{m} \right) (1 - \omega_{bb})$ |
| workers    | aa   | $x_{aa+aa}^{\delta}(t) = f \left( c + (1-c) \frac{M_{aa,a}}{m} \right) \omega_{aa}$        | $x_{ab+aa}^{\delta}(t) = f(1-c) \frac{1}{2} \frac{M_{ab,a}}{m} \omega_{aa}$                                       | $x_{bb+aa}^{\delta}(t) = 0$                                                                |
|            | ab   | $x_{aa+ab}^{\delta}(t) = f(1-c) \frac{M_{aa,b}}{m} \omega_{ab}$                            | $x_{ab+ab}^{\delta}(t) = f \left( c + (1-c) \frac{1}{2} \frac{M_{ab,a} + M_{ab,b}}{m} \right) \omega_{ab}$        | $x_{bb+ab}^{\delta}(t) = f(1-c) \frac{M_{bb,a}}{m} \omega_{ab}$                            |
|            | bb   | $x_{aa+bb}^{\delta}(t) = 0$                                                                | $x_{ab+bb}^{\delta}(t) = f(1-c) \frac{1}{2} \frac{M_{ab,b}}{m} \omega_{bb}$                                       | $x_{bb+bb}^{\delta}(t) = f \left( c + (1-c) \frac{M_{bb,b}}{m} \right) \omega_{bb}$        |
|            | hyb  | $x_{aa+hyb}^{\delta}(t) = f(1-c) \frac{M_{aa,h}}{m}$                                       | $x_{ab+hyb}^{\delta}(t) = f(1-c) \frac{M_{ab,h}}{m}$                                                              | $x_{bb+hyb}^{\delta}(t) = f(1-c) \frac{M_{bb,h}}{m}$                                       |

4

**Table S1: Colonial investment in males, queens and workers.** Each entry in the table gives the investment into one type of individuals (given caste/genotype combination; rows), in a colony led by a queen with a given genotype (columns). Each expression depends only on models parameters and genotypic values for each trait. Genotypic values for hybridization probability in queens of genotype  $u$  ( $\eta_u$ ) do not appear explicitly but determine the distribution of the random variables  $M_{u,a}$ ,  $M_{u,b}$  and  $M_{u,h}$  (eq. A-3). To see how we constructed this table, consider for e.g. the investment  $x_{ab+ab}^{\varphi}(t)$  in queens of genotype  $ab$  in a colony led by a queen of genotype  $ab$  (fourth row, second column). First, queens can arise only from the fraction  $f$  of the brood that is diploid. Next, as the laying queen is of genotype  $ab$ , the fraction  $c$  of diploid eggs that are produced through parthenogenesis will also be of genotype  $ab$ . The fraction  $(1-c)$  of diploid eggs that are fertilised through regular sex is  $ab$  with a probability that depends on the queen's mates:  $(M_{ab,a} + M_{ab,b})/(2m)$  (assuming random chromosomal segregation and fertilisation, e.g. because the amount of sperm provided by each male is the same and well-mixed within a queen's spermathecae). Finally, diploid  $ab$  eggs develop into queens with probability  $1 - \omega_{ab}$ . The other entries of the table are derived similarly.



702 that  $p_a^\delta(t) = 1 - p_b^\delta(t)$  and  $p_{aa}^\varphi(t) = 1 - p_{bb}^\varphi(t) - p_{ab}^\varphi(t)$ , we obtain a recurrence equation,

$$\begin{pmatrix} p_b^\delta(t+1) \\ p_{ab}^\varphi(t+1) \\ p_{bb}^\varphi(t+1) \end{pmatrix} = \mathbf{F} \begin{pmatrix} p_b^\delta(t) \\ p_{ab}^\varphi(t) \\ p_{bb}^\varphi(t) \end{pmatrix}, \quad (\text{A-4})$$

704 that is characterised by a mapping  $\mathbf{F} : [0, 1]^3 \rightarrow [0, 1]^3$ . This recurrence is too complicated to be presented here for the general case but can straightforwardly be iterated numerically to track allelic frequency changes for given parameter values (see Mathematica notebook for e.g.).

## 706 **A.2 Long-term evolution: adaptive dynamics**

To gain more analytical insights, we use the recurrence eq. (A-4) to study the long term adaptive dynamics of both traits under the assumption that traits evolve via mutations that are rare and with weak additive phenotypic effects.

### 710 **A.2.1 Invasion fitness of rare additive allele**

An adaptive dynamics model is typically based on the invasion fitness of a mutant allele in a population that is otherwise fixed for a resident allele (i.e. the asymptotic growth rate of a mutant allele). To obtain this invasion fitness, we first introduce some notation. We denote the resident allele by a vector  $z = (\omega, \eta)$  where  $\omega$  is probability that a larva homozygote for the resident allele develops into a worker, and  $\eta$  is the probability that a mate of queen homozygote for the resident allele is allo-specific. Similarly, the mutant allele is described by a vector  $\zeta = (\omega + \delta_\omega, \eta + \delta_\eta)$  whose first entry gives the probability that a larva homozygote for the mutant allele develops into a worker, and whose second entry is the probability that a mate of a queen homozygote for the mutant allele is allo-specific ( $\delta_\omega$  and  $\delta_\eta$  thus denote the mutant effect on trait values). Assuming additive genetic effects on phenotypes, a heterozygote then expresses phenotype  $(\omega + \delta_\omega/2, \eta + \delta_\eta/2)$ .

722 To use the recurrence equations developed in the previous section, we arbitrarily set allele  $a$  as the resident and  $b$  as the mutant. The allele specific trait values (appearing in table S1 and eq. A-3) are



then replaced by:

$$\begin{aligned}
 \omega_{aa} &= \omega & \eta_{aa} &= \eta \\
 \omega_{ab} &= \omega + \frac{1}{2}\delta_{\omega} & \eta_{ab} &= \eta + \frac{1}{2}\delta_{\eta} \\
 \omega_{bb} &= \omega + \delta_{\omega} & \eta_{bb} &= \eta + \delta_{\eta}.
 \end{aligned}
 \tag{A-5}$$

724 Next, we use the fact that the mutant is rare so that its frequency in the population is of the order  
of a small parameter denoted  $0 < \epsilon \ll 1$ . As a rare allele can only be found in heterozygous form  
726 in a large panmictic population, the initial dynamics of a mutant allele  $b$  can be described through  
linear approximations of  $p_b^{\delta}(t+1)$  and  $p_{ab}^{\varphi}(t+1)$  at a near-zero frequency of  $b$  (e.g. Brännström et al.,  
728 2013). In other words, eq. (A-4) can be linearised to

$$\begin{pmatrix} p_b^{\delta}(t+1) \\ p_{ab}^{\varphi}(t+1) \end{pmatrix} = \mathbf{A}(\zeta, z) \begin{pmatrix} p_b^{\delta}(t) \\ p_{ab}^{\varphi}(t) \end{pmatrix} + \mathcal{O}(\epsilon^2),
 \tag{A-6}$$

where  $\mathbf{A}(\zeta, z)$  is a  $2 \times 2$  matrix that depends on mutant and resident phenotypes,  $\zeta$  and  $z$ , and  $\epsilon$  is a  
730 small parameter of the order of the frequency of the mutant  $b$  in males and queens.

The invasion fitness of the mutant phenotype, which we write as  $W(\zeta, z)$ , is then given by the leading  
732 eigenvalue of  $\mathbf{A}(\zeta, z)$  (e.g. Caswell, 2000), i.e.

$$W(\zeta, z) = \lambda_{\max}(\mathbf{A}(\zeta, z)),
 \tag{A-7}$$

where  $\lambda_{\max}(\mathbf{M})$  gives the leading eigenvalue of a matrix  $\mathbf{M}$ . In a large population,  $W(\zeta, z)$  tells the  
734 fate of the mutant allele. If  $W(\zeta, z) \leq 1$ , then the mutant allele is purged by selection and vanishes  
with probability one. Otherwise if  $W(\zeta, z) > 1$ , the mutant has a non zero probability of invading  
736 the population (e.g. Brännström et al., 2013).

## A.2.2 Directional selection

738 When mutations are rare with weak phenotypic effects, the population first evolves under directional  
selection whereby an advantageous mutation fixes before a new mutation arises so that the popula-  
740 tion “jumps” from one monomorphic state to another (Dercole and Rinaldi, 2008). To study these  
dynamics, we use the selection gradient,  $s(z)$ , which is a vector pointing in the direction favoured  
742 by selection at every point  $z \in [0, 1] \times [0, 1]$  of the phenotypic space (i.e., the space of all possible

phenotypic combinations with  $\omega$  and  $\eta$  both between 0 and 1 as they are both probabilities) . This  
 744 vector is given by the marginal effect of each trait on invasion fitness, i.e.

$$s(z) = \begin{pmatrix} s_\omega(z) \\ s_\eta(z) \end{pmatrix} = \begin{pmatrix} \left. \frac{\partial W(\zeta, z)}{\partial \delta_\omega} \right|_{\zeta=z} \\ \left. \frac{\partial W(\zeta, z)}{\partial \delta_\eta} \right|_{\zeta=z} \end{pmatrix}, \quad (\text{A-8})$$

where  $s_\omega(z)$  and  $s_\eta(z)$  give the direction of selection on  $\omega$  and  $\eta$  respectively.

746 **Singular strategies.** A singular strategy,  $z^* = (\omega^*, \eta^*)$ , is such that all selection gradients are equal to zero,

$$s(z^*) = \mathbf{0}. \quad (\text{A-9})$$

748 A singular strategy therefore represents a potential equilibrium of adaptive dynamics (Brännström et al., 2013).

750 **Jacobian matrix and convergence stability.** Whether the population evolves towards or away from a singular strategy  $z^*$  depends on the Jacobian matrix,

$$\mathbf{J}(z^*) = \begin{pmatrix} \left. \frac{\partial s_\omega(z)}{\partial \omega} \right|_{z=z^*} & \left. \frac{\partial s_\omega(z)}{\partial \eta} \right|_{z=z^*} \\ \left. \frac{\partial s_\eta(z)}{\partial \omega} \right|_{z=z^*} & \left. \frac{\partial s_\eta(z)}{\partial \eta} \right|_{z=z^*} \end{pmatrix}. \quad (\text{A-10})$$

752 Specifically, one necessary condition for a singular strategy to be an evolutionary attractor is that the greatest real part of the eigenvalues of  $\mathbf{J}(z^*)$  is negative (Leimar, 2009). Such a singular strategy  $z^*$   
 754 is said to be convergence stable. Otherwise, the population will be repelled away from  $z^*$ . Even if  $z^*$  is convergence stable, it is possible for the population to evolve away from  $z^*$  when both evolving  
 756 traits are genetically correlated (Leimar, 2009). A sufficient condition for a singular strategy to be an attractor is that the symmetric part of the Jacobian matrix,  $(\mathbf{J}(z^*) + \mathbf{J}(z^*)^T)/2$ , is negative-definite, in  
 758 which case  $z^*$  is said to be *strongly* convergence stable (Leimar, 2009). When this is true, the population evolves towards  $z^*$ , whatever the genetic correlations between both traits (i.e. independently  
 760 from the statistical distribution of mutational effects on both traits).

### A.2.3 Stabilising/disruptive selection.

762 Once the population is at an equilibrium for directional selection (i.e. a convergence stable phe-  
764 notype), it either remains monomorphic under stabilising selection (when the equilibrium is evo-  
lutionary stable or uninvadable, Parker and Maynard Smith, 1990) or becomes polymorphic due  
766 to disruptive selection (when the equilibrium is not evolutionary stable or invadable, Geritz et al.,  
1989; Leimar, 2009; Geritz et al., 2016),

$$\mathbf{H}(z^*) = \begin{pmatrix} h_{\omega\omega}(z^*) & h_{\omega\eta}(z^*) \\ h_{\omega\eta}(z^*) & h_{\eta\eta}(z^*) \end{pmatrix} = \begin{pmatrix} \frac{\partial^2 W(\zeta, z)}{\partial \delta_\omega^2} \Big|_{\zeta=z=z^*} & \frac{\partial^2 W(\zeta, z)}{\partial \delta_\omega \partial \delta_\eta} \Big|_{\zeta=z=z^*} \\ \frac{\partial^2 W(\zeta, z)}{\partial \delta_\omega \partial \delta_\eta} \Big|_{\zeta=z=z^*} & \frac{\partial^2 W(\zeta, z)}{\partial \delta_\eta^2} \Big|_{\zeta=z=z^*} \end{pmatrix}. \quad (\text{A-11})$$

768 An equilibrium  $z^*$  is uninvadable if  $\mathbf{H}(z^*)$  is negative-definite. Otherwise, selection may be dis-  
ruptive and the population may experience evolutionary branching, whereby it splits among two  
770 diverging morphs (Geritz et al., 1998; Leimar, 2009; Geritz et al., 2016).

### A.3 Individual-based simulations

772 To complement our mathematical analysis, we also performed individual based simulations (an  
R script implementing these is provided as a supplement here: [https://zenodo.org/record/](https://zenodo.org/record/4434257)  
774 [4434257](https://zenodo.org/record/4434257)). These simulations track a population of  $N_q = 10000$  diploid queens (with  $f = 0.5$ ,  
see figure legends for other parameters). Each queen is characterized by its genotype: a pair of hap-  
776 lotypes, each of which is given by the values of  $\omega$  and  $\eta$  they code for (so four genotypic values in  
total). Simulations are initialized by setting both haplotypes of all  $N_q$  queens to the same arbitrary  
778 values (i.e. we start with a monomorphic population). Each generation of a simulation consists of  
the following steps:

780 1. **Mating.** First, queens mate. To model this process, we first compute the propensity  $\eta_i$  of each  
queen  $i \in \{1, 2, \dots, N_q\}$  to hybridize as the mean of the two relevant alleles it is carrying. Then,  
782 each queen  $i$  is mated with a number  $m_i$  of conspecific haploid males. This number  $m_i$  is drawn  
from a binomial distribution with  $m$  trials and success probability  $(1 - \eta_i)$  (in line with eq. A-3).  
784 At the first generation, all males carry the same genetic values for  $\omega$  and  $\eta$  as queens (i.e. the  
initial trait values). In subsequent generations, males are sampled (with replacement) as single

786 haplotypes from the  $2i$  haplotypes present in the laying queens of the previous generation.  
Following eq. (A-2a), the probability to sample a given haplotype is weighted by the investment  
788 in workers within its colony of origin (as the investment in workers increases the probability  
for males to reach the mating pool).

790 **2. Colony development.** Each queen  $i$  settles to form a colony. We characterise each colony in  
two steps. First, a list is constructed that contains the  $2m_i$  non-hybrid diploid female genotypes  
792 produced within each colony (i.e. the combinations of the alleles of a queen and of its con-  
specific mates). If thelytokous parthenogenesis is included ( $c > 0$ ), the genotype of the queen  
794 itself is added to this list. Second, the investment in workers within each colony is calculated  
following equations in table S1 and eq. (A-2b). These calculations use the genetic value ex-  
796 pressed by each of the  $2m_i + 1$  non-hybrid genotype within the female progeny (characterised  
in the first step), as well as the proportion of the brood produced sexually and asexually (the  
798 parameter  $c$ ), the proportion of conspecific and allospecific males the queen has mated with  
(i.e.  $m_i/m$  and  $1 - m_i/m$ ), and the efficiency of hybrid workers (the parameter  $e$ ).

800 **3. Next-generation queens.** To generate the next generation of queens,  $N_q$  new diploid female  
genotypes are sampled (with replacement) from all non-hybrid genotypes produced within  
802 each colony. Following table S1, the probability to sample a given genotype is weighted by  
its own genetic value of  $(1 - \omega)$  and by the investment in workers within its colony of origin  
804 (as the investment in workers increases the probability for queens to reach the mating pool).  
Finally, each genotypic value independently mutates with probability  $10^{-2}$ . Mutation effects  
806 are drawn independently from a normal distribution with mean 0 and standard deviation  $10^{-2}$ .  
Mutated genetic values are capped between 0 and 1 to ensure that traits remain within their  
808 domain of definition.

## B Analyses

810 Here, we present the derivations of our results summarised in the main text. These derivations are  
organised in the same order as they appear in the main text. As a supplement, we also provide a  
812 Mathematica (Wolfram Research, 2020) notebook that allows to follow our analyses.

### B.1 Baseline model

814 We first explore the baseline case where females mate with a large (effectively infinite) number of  
mates and there is no parthenogenesis (i.e. when  $m \rightarrow \infty$  and  $c = 0$ ).

#### 816 B.1.1 Independent evolution of genetic caste determination

As presented in the main text, we initially assume that hybridization  $\eta$  is fixed and only caste deter-  
818 mination  $\omega$  evolves. Using eq. (A-8) with  $m \rightarrow \infty$  and  $c = 0$ , we find that the selection gradient on  
genetic caste determination is,

$$s_{\omega}(z) = \frac{1}{6} \left( \frac{1 - \eta}{\eta e + (1 - \eta)\omega} - \frac{2}{1 - \omega} \right). \quad (\text{B-1})$$

820 Accordingly, there is a unique singular strategy  $\omega^*$  for caste determination when hybridization  $\eta$  is  
fixed (i.e.  $\omega^*$  such that  $s_{\omega}((\omega^*, \eta)) = 0$ ),

$$\omega^* = \frac{1}{3} - e \frac{2\eta}{3(1 - \eta)}, \quad (\text{B-2})$$

822 which is eq. 1 of the main text.

It is straightforward to show that with hybridization fixed, the singular strategy (eq. B-2) is conver-  
824 gence stable (plugging eq. B-2 into the Jacobian, that is eq. A-10, for a single trait with  $m \rightarrow \infty$  and  
 $c = 0$ ),

$$\left. \frac{\partial s_{\omega}(z)}{\partial \omega} \right|_{\omega=\omega^*} = -\frac{9(1 - \eta)^2}{4(1 + \eta(e - 1))^2} < 0 \quad (\text{B-3})$$

826 as well as uninvadable (plugging eq. B-2 into the Hessian, that is eq. A-11, for a single trait with  
 $m \rightarrow \infty$  and  $c = 0$ ),

$$\left. \frac{\partial^2 W(\zeta, z)}{\partial \delta_{\omega}^2} \right|_{\omega=\omega^*} = -\frac{3(1 - \eta)^2}{4(1 + \eta(e - 1))^2} < 0. \quad (\text{B-4})$$

828 Therefore, when hybridization is fixed, our analyses show that genetic caste determination will grad-  
 ually evolve to the singular value eq. (B-2) and remain monomorphic for this value (which is what  
 830 we observe when we simulate this scenario, fig. 2A).

### B.1.2 Coevolution of genetic caste determination and hybridization

832 **An unstable singularity.** When both caste determination  $\omega$  and hybridization  $\eta$  evolve, their  
 trajectories under directional selection are given by the selection gradient vector,

$$s(z) = \begin{pmatrix} s_\omega(z) \\ s_\eta(z) \end{pmatrix} = \begin{pmatrix} \frac{1}{6} \left( \frac{1-\eta}{\eta e + (1-\eta)\omega} - \frac{2}{1-\omega} \right) \\ \frac{1}{1-\eta} \left( \frac{e}{3[\eta e + (1-\eta)\omega]} - \frac{1}{2} \right) \end{pmatrix} \quad (\text{B-5})$$

834 (from eq. A-8 with  $m \rightarrow \infty$  and  $c = 0$ ). Solving the above for  $z^* = (\omega^*, \eta^*)$  such that  $s(z^*) = (0, 0)$   
 yields a single singular strategy in two dimensional trait space,

$$z^* = \begin{pmatrix} \omega^* \\ \eta^* \end{pmatrix} = \begin{pmatrix} e + \frac{e-1}{3} \\ 2 + \frac{1}{e-1} \end{pmatrix}, \quad (\text{B-6})$$

836 which is plotted in fig. 3A against  $e$ . However, when we look at the Jacobian matrix of the system  
 eq. (B-5) at this singular value (i.e. substitute eqs. B-5 and B-6 into eq. A-10),

$$\mathbf{J}(z^*) = \begin{pmatrix} -\frac{9}{16(e-1)^2} & -\frac{3}{8e} \\ -\frac{3}{4e} & -\frac{(e-1)^2}{4e^2} \end{pmatrix}, \quad (\text{B-7})$$

838 we see that this matrix has a negative determinant,

$$\det(\mathbf{J}(z^*)) = -\frac{9}{64e^2} < 0 \quad (\text{B-8})$$

so its eigenvalues cannot both be negative (since the product of the eigenvalues of a matrix is equal  
 840 to its determinant). Hence the singular value  $z^*$  eq. (B-6) is not convergence stable, but rather an  
 evolutionary repeller.

842 Our result that evolutionary trajectories will be repelled away from the singular value eq. (B-6) tells

us that adaptive dynamics will eventually get to the boundary of the trait space. This trait space  
844 consists of the square  $[0, 1] \times [0, 1]$  (as both traits must be between zero and one). Two edges of this  
square (when  $\omega = 1$  or  $\eta = 1$ ) cannot be accessed by evolutionary dynamics as either of these trait  
846 values lead to zero fitness (as a population monomorphic for  $\omega = 1$  or  $\eta = 1$  produces no queen in  
our baseline model). We can therefore focus on dynamics along the edges  $\eta = 0$  or  $\omega = 0$  of the trait  
848 space, which respectively correspond to the case of hybridization avoidance and worker-loss.

**Convergence to hybridization avoidance.** Evolutionary dynamics will settle somewhere on the  
850 edge where hybridization is absent in the population ( $\eta = 0$ ) only if: (1) selection on hybridization  
maintains it at zero (i.e.  $s_\eta(z) \leq 0$  when  $\eta = 0$ ); and (2) selection on caste determination settles for  
852 an equilibrium  $\omega^*$  (i.e.  $s_\omega(z) = 0$  for some  $\omega^*$  when  $\eta = 0$ ). From eq. (B-5), these two conditions  
are true when  $e \leq 1/2$  and the equilibrium for caste determination is simply  $\omega^* = 1/3$  (in line with  
854 eq. B-2). As established in eq. (B-3), this equilibrium is convergence stable and evolutionary stable  
when  $\eta$  is fixed.

**Convergence to worker-loss.** Similarly, for adaptive dynamics to converge somewhere on the  
856 edge where workers are no longer produced from regular sex ( $\omega = 0$ ), these two conditions are  
858 necessary: (1) selection on caste determination maintains  $\omega = 0$  (i.e.  $s_\omega(z) \leq 0$  when  $\omega = 0$ ); and  
(2) selection on hybridization favours an equilibrium  $\eta^*$  (i.e.  $s_\eta(z) = 0$  for some  $\eta^*$  when  $\omega = 0$ ).  
860 Substituting eq. (B-5) into these conditions, they reduce to  $e \geq 1/4$  and  $\eta^* = 2/3$ . In addition, we  
see from eq. (B-5) that when  $\omega = 0$ ,

$$\left. \frac{\partial s_\eta(z)}{\partial \eta} \right|_{\eta=2/3} = -\frac{9}{4} < 0, \quad (\text{B-9})$$

862 and we further find that

$$\left. \frac{\partial^2 W(\zeta, z)}{\partial \delta_\eta^2} \right|_{\eta=2/3} = -\frac{3}{4} < 0. \quad (\text{B-10})$$

This tells us that the population will converge towards and remain monomorphic for  $\eta^* = 2/3$  when  
864  $\omega = 0$  is fixed.

**Three phase portraits.** Put together, the above observations allow us to deduce that depending  
866 on the parameter  $e$ , there are three possible types of phase portraits for the adaptive dynamics of both  
traits (fig. 3B-D). When  $e \leq 1/4$ , the singular value eq. (B-6) is outside of the trait space (or on its

868 boundary when  $e = 1/4$ ) and the point  $(\omega = 1/3; \eta = 0)$  is an evolutionary stable attractor, meaning  
that the population will converge towards hybridization avoidance (fig. 3B). When  $e \geq 1/2$ , the  
870 singular value eq. (B-6) is also outside of the trait space (or on its boundary when  $e = 1/2$ ) and the  
point  $(\omega = 0; \eta = 2/3)$  is an evolutionary stable attractor, meaning that the population will converge  
872 towards worker-loss (fig. 3D). Finally when  $1/4 < e < 1/2$ , the singular value eq. (B-6) is a repeller  
that lies within the trait space (i.e.  $0 < \omega^* < 1$  and  $0 < \eta^* < 1$ ) and both points  $(\omega = 1/3; \eta = 0)$  and  
874  $(\omega = 0; \eta = 2/3)$  are evolutionary stable attractors. In this case evolutionary dynamics will depend  
on initial values (fig. 3C).

### 876 B.1.3 Decomposition of directional selection in terms of inclusive fitness effects

**The kin selection approach.** In this section, we use the so-called "kin selection" or "inclusive  
878 fitness" approach to obtain the selection gradient eq. (B-5) (Taylor and Frank, 1996). This approach,  
which is based on invasion analyses of alleles in class-structured populations, gives the same quan-  
880 titative result about directional selection than other common methods in theoretical evolutionary  
biology such as adaptive dynamics, population or quantitative genetics (assuming genetic variance  
882 for traits is small, e.g. Taylor and Frank, 1996; Rousset, 2004; Lehmann et al., 2016). But one partic-  
ular advantage of a kin selection approach is that it immediately decomposes directional selection  
884 on mutant alleles into the sum of: (1) their direct fitness effects on the reproductive success of the  
individuals that express them; and (2) of their indirect fitness effects on other related individuals  
886 that can also transmit them. This decomposition allows to delineate the various forces at play in the  
evolution of social behaviours (Hamilton, 1964). Here, we use it to better understand the evolution  
888 towards worker-loss (and obtain fig. 3E-F).

We follow Taylor and Frank (1996)'s general method. Consider a population with mean trait values  
890  $\omega$  and  $\eta$ . In this population, consider a focal colony that is home to a mutant allele that codes for  
deviant trait values  $\eta_*$  in queens and  $\omega_*$  in larvae that carry this allele. Let  $\omega_0$  denote the mean trait  
892 value expressed by all larvae within this focal colony. Using this notation, the expected number of  
successful (i.e. that mate) males that are produced by the focal colony and that carry the mutant  
894 allele is given by,

$$w_\delta = \frac{(1-f)[f((1-\eta_*)\omega_0 + \eta_*e)]}{(1-f)[f((1-\eta)\omega + \eta e)]}, \quad (\text{B-11})$$

where the numerator and denominator are the total number of males produced by the focal and a



896 random colony, respectively. For the focal colony (the numerator),  $(1 - f)$  is the probability that  
 an egg is haploid (i.e. male) while the term in square brackets is the colony's investment in workers  
 898 (which in our model is also the probability that a sexual reaches maturity). The denominator follows  
 the same logic for an average colony in the population.

900 Similarly, the expected number of successful queens that are produced by the focal colony that carry  
 the mutant allele is,

$$w_{\varphi} = \frac{f(1 - \eta_{\bullet})(1 - \omega_{\bullet})[f((1 - \eta_{\bullet})\omega_0 + \eta_{\bullet}e)]}{f(1 - \eta)(1 - \omega)[f((1 - \eta)\omega + \eta e)]}, \quad (\text{B-12})$$

902 where  $f(1 - \eta_{\bullet})(1 - \omega_{\bullet})$  is the number of queens produced in the focal colony and the term in square  
 brackets is the probability that a queen survives till mating (i.e. the colony's investment in workers).

904 **Fitness effects within a mutant colony.** With the above notation, the selection gradient vector  
 can then be computed as,

$$s(z) = \begin{pmatrix} s_{\omega}(z) \\ s_{\eta}(z) \end{pmatrix} \propto \begin{pmatrix} v_{\varphi} \frac{\partial w_{\varphi}}{\partial \omega_{\bullet}} + v_{\delta} \frac{\partial w_{\delta}}{\partial \omega_0} r_{1m} + v_{\varphi} \frac{\partial w_{\delta}}{\partial \omega_0} r_{1f} \\ v_{\delta} \frac{\partial w_{\delta}}{\partial \eta_{\bullet}} r_{qm} + v_{\varphi} \frac{\partial w_{\delta}}{\partial \eta_{\bullet}} r_{qf} \end{pmatrix}, \quad (\text{B-13})$$

906 where all derivatives are evaluated at  $\omega_{\bullet} = \omega_0 = \omega$  and  $\eta_{\bullet} = \eta_0 = \eta$ ;  $r_{1m}$  is the relatedness of a female  
 larva to a brother;  $r_{1f}$  is the relatedness of a female larva to a sister;  $r_{qm}$  is the relatedness of a queen  
 908 to its sons;  $r_{qf}$  is the relatedness of a queen to its daughters;  $v_{\delta}$  is the reproductive value of males and  
 $v_{\varphi}$  is the reproductive value of queens (all these relatedness coefficients and reproductive values are  
 910 for a monomorphic population, Taylor and Frank, 1996; Rousset and Ronce, 2004; Lehmann et al.,  
 2016). Plugging eqs. (B-11) and (B-12) into eq. (B-13) with relatedness coefficients and reproductive  
 912 values corresponding to a haplodiploid system with infinite matings (i.e.  $r_{1m} = 1/2$ ,  $r_{1f} = 1/4$ ,  
 $r_{qm} = 1$ ,  $r_{qf} = 1/2$ ,  $v_{\delta} = 1/2$ ,  $v_{\varphi} = 1$ ), we obtain expressions equivalent to eq. (B-5). But in  
 914 contrast to eq. (B-5), the selection gradients in eq. (B-13) are expressed as a sum of fitness effects of  
 a mutant allele via a given category of individual. More specifically, the gradient  $s_{\omega}(z)$  in eq. (B-13)  
 916 is decomposed as the fitness effects of an allele coding for a mutant value of  $\omega$  in larvae: on the  
 larvae that express this allele ( $v_{\varphi} \frac{\partial w_{\varphi}}{\partial \omega_{\bullet}}$ , yellow line in fig. 3E), on their brothers ( $v_{\delta} \frac{\partial w_{\delta}}{\partial \omega_0} r_{1m}$ , blue line  
 918 in fig. 3E), and on their sisters (i.e. queens,  $v_{\varphi} \frac{\partial w_{\delta}}{\partial \omega_0} r_{1f}$ , red line in fig. 3E) that can also transmit the  
 allele. Similarly, the gradient  $s_{\eta}(z)$  in eq. (B-13) is composed of the fitness effects of an allele coding  
 920 for a mutant value of  $\eta$  in queens: via their sons ( $v_{\delta} \frac{\partial w_{\delta}}{\partial \eta_{\bullet}} r_{qm}$ , blue line in fig. 3F) and daughters

(i.e. queens,  $v_q \frac{\partial w_\delta}{\partial \eta} r_{qf}$ , red line in fig. 3F). To construct panels E and F of fig. 3, we evaluated these  
922 five terms outlined above at every step of an evolutionary trajectory from the baseline equilibrium  
in absence of hybridization ( $\omega = 1/3, \eta = 0$ ) to complete worker-loss ( $\omega = 0, \eta = 2/3$ ). The  
924 evolutionary trajectory was obtained by iteration, starting from the baseline equilibrium and taking  
steps of size 0.001 (in units of trait space) in the direction of the selection gradient (eq. B-5).

#### 926 **B.1.4 Correspondence with Reuter and Keller (2001)**

Here we connect our results to those of Reuter and Keller (2001), who used a kin selection approach  
928 to study the evolution of caste determination when under full queen, full larval, or mixed control  
(in the absence of hybridization). Our model corresponds to the case of full larval control (eq. 3 of  
930 Reuter and Keller, 2001). Our selection gradient  $s_\omega(z)$ , shown in eq. (B-1) with  $\eta = 0$ , reduces to  
eq. 3 of Reuter and Keller (2001) when we assume linear effects of investment in workers on colony  
932 productivity. More specifically, if we set their term  $\Delta_c = \delta s / (\delta w) \times 1/f$  (their notation in their eq. 3,  
where  $\Delta_c$  corresponds to the gain in sexual production brought by one additional worker) to

$$\Delta_c = \frac{1 - fw}{w}, \quad (\text{B-14})$$

934 and assume that the population is monogynous and highly polyandrous with balanced sex-ratio (i.e.  
in their notation,  $f = 1/2; g_f = 1/4; g_m = 1/2; v_f = 2; v_m = 1$ ), then we find that eq. 3 of Reuter  
936 and Keller (2001) is proportional to our selection gradient  $s_\omega(z)$  (eq. B-1) with  $\eta = 0$ . In line with  
this, both yield the convergence stable equilibrium  $w^* = 1/3$ .

## 938 **B.2 Extensions**

We now consider several extensions to our baseline model.

### 940 **B.2.1 Effect of finite matings**

First, we relax our assumption that queens mate with an infinite number of mates (i.e.  $m < \infty$ ).

942 **Selection gradient.** Working from eq. (A-8) with  $c = 0$ , we find that the selection gradient vector on caste determination  $\omega$  and hybridization  $\eta$  under finite matings reads as,

$$s(z) = \begin{pmatrix} s_\omega(z) \\ s_\eta(z) \end{pmatrix} = \begin{pmatrix} \frac{1}{6} \left( \frac{1-\eta}{\eta e + (1-\eta)\omega} - \frac{2}{1-\omega} + \frac{3e\eta + 2(1-\eta)\omega}{2[\eta e + (1-\eta)\omega][\eta e(m-1) + (1-\eta)\omega m + \eta\omega]} \right) \\ \frac{1}{1-\eta} \left( \frac{e}{3[\eta e + (1-\eta)\omega]} - \frac{1}{2} \right) + \frac{\omega}{6\eta} \left( \frac{1}{\eta e + (1-\eta)\omega} - \frac{m}{\eta e(m-1) + (1-\eta)\omega m + \eta\omega} \right) \end{pmatrix}. \quad (\text{B-15})$$

944 These gradients are complicated but we can extract relevant information by starting our analysis on the two boundaries of the trait space along which evolutionary dynamics may end up ( $\omega = 0$  or  $\eta = 0$ ). Using eq. (B-15), we ask first when is worker-loss ( $\omega = 0$ ) stable? And second when is hybridization avoidance ( $\eta = 0$ ) stable?

948 **Stability of worker-loss.** Worker-loss is stable only if: (1) selection maintains  $\omega$  at zero (i.e.  $s_\omega(z) \leq 0$  when  $\omega = 0$ ); and (2) selection on hybridization settles for an equilibrium  $\eta^*$  (i.e.  $s_\eta(z) = 0$  for some  $\eta^*$  when  $\omega = 0$ ). From eq. (B-15), these two conditions reduce to

$$e \geq \frac{1}{4} + \frac{9}{8(m-1)} \quad (\text{B-16})$$

(region above dashed line in fig. 4A) and

$$\eta^* = 2/3. \quad (\text{B-17})$$

952 Note that condition (B-16) becomes impossible as  $m \rightarrow 1$ . This indicates that worker-loss cannot evolve under monandry in this model. For  $m > 1$ , it is straightforward to show that when condition 954 (B-16) is true, the strategy  $\eta = 2/3$  is both convergence stable and evolutionary stable when  $\omega = 0$  (eqs. B-9 and B-10 for e.g. of the type of argument used).

956 **Stability of hybridization avoidance.** Conversely, hybridization avoidance is stable only if: (1) selection on hybridization maintains  $\eta$  at zero (i.e.  $s_\eta(z) \leq 0$  when  $\eta = 0$ ); and (2) selection on caste 958 determination in absence of hybridization settles for an equilibrium  $\omega^*$  (i.e.  $s_\omega(z) = 0$  for some  $\omega^*$

when  $\eta = 0$ ). From eq. (B-15), these two conditions reduce to

$$e \leq \frac{1}{2} + \frac{1}{2} \frac{5m - 1}{6m^2 - m - 1} \quad (\text{B-18})$$

960 (region below plain line in fig. 4A) and

$$\omega^* = \frac{1}{3} + \frac{2}{3(1 + 3m)}. \quad (\text{B-19})$$

962 Again, it is straightforward to show that when condition (B-18) holds, the strategy given by eq. (B-19) is both convergence stable and evolutionary stable when  $\eta = 0$  (eqs. B-3 and B-4 for e.g. of argument).

964 Together, conditions (B-16) and (B-18) split the parameter space into 4 areas where both, none, or only one of the conditions are met (fig. 4A). Where condition (B-18) is met but (B-16) is not (grey region of fig. 4A), hybridization cannot evolve when rare and worker-loss cannot be maintained. We therefore focus on the three remaining cases where worker loss can emerge. Doing so, we find that 968 there are four possible types of evolutionary dynamics.

**Type 1: Evolution towards worker-loss.** Where condition (B-16) is met but (B-18) is not (dark green region of fig. 4A), selection favours the emergence of hybridization and maintenance of worker-loss. In addition, it can be shown that under these conditions, there exists no singular 970 strategy within the trait space (i.e., there exists no  $z^* = (\omega^*, \eta^*)$  such that  $0 < \omega^*, \eta^* < 1$  and  $s(z^*) = (0, 0)$ , e.g. using the function Reduce[] in Mathematica, see notebook). This means that the 972 phase portrait of evolutionary dynamics is qualitatively the same as in fig. 3D: worker-loss always evolves.

976 **Type 2: Evolution towards worker-loss or hybridization avoidance depending on initial conditions.** Where conditions (B-16) and (B-18) are met simultaneously, both worker-loss and 978 hybridization avoidance are stable so either strategy is maintained when common (when  $m \geq 5$ , light green region of fig. 4A). Under these conditions, we find that there exists a singular strategy 980 within the trait space (top row, columns  $m = 5$  and  $m = 6$  in fig. S1 for numerical values, see Mathematica notebook for analytical expression). When we compute numerically the leading eigenvalue 982 of the system's Jacobian matrix, we find that it is positive (fig. S1, second row, columns  $m = 5$  and  $m = 6$ , dashed line), revealing that the singularity is an evolutionary repeller. Therefore the phase

984 portrait of evolutionary dynamics is qualitatively the same as in fig. 3C: depending on initial conditions, evolutionary dynamics will lead to worker-loss or hybridization avoidance.

986 **Type 3: Convergence stable and uninvadable intermediate strategy.** Where neither condition (B-16) nor (B-18) are met, neither worker-loss nor hybridization avoidance are stable (when  
 988  $m \leq 4$ , blue region of fig. 4A). In this case, a singular strategy within the trait space also exists ( $0 < \omega^*, \eta^* < 1$ ; fig. S1, top row, columns  $m \in \{1, 2, 3, 4\}$  for numerical values; Mathematica notebook for analytical expression). But now, this intermediate strategy is (strongly) convergence stable as indicated by a negative leading eigenvalue of both the Jacobian matrix and its symmetric part  
 990 (fig. S1, second row, columns  $m \in \{1, 2, 3, 4\}$ , dashed and dotted lines). When  $m \in \{2, 3, 4\}$ , this intermediate strategy is also uninvadable as shown by a negative leading eigenvalue of the Hessian  
 992 matrix (fig. S1, second row, columns  $m \in \{2, 3, 4\}$ , full line). Thus, when the number of mates is between two and four ( $m \in \{2, 3, 4\}$ ) and neither conditions (B-16) and (B-18) are met, the population  
 994 converges and remains monomorphic for an intermediate strategy  $0 < \omega^*, \eta^* < 1$ .  
 996

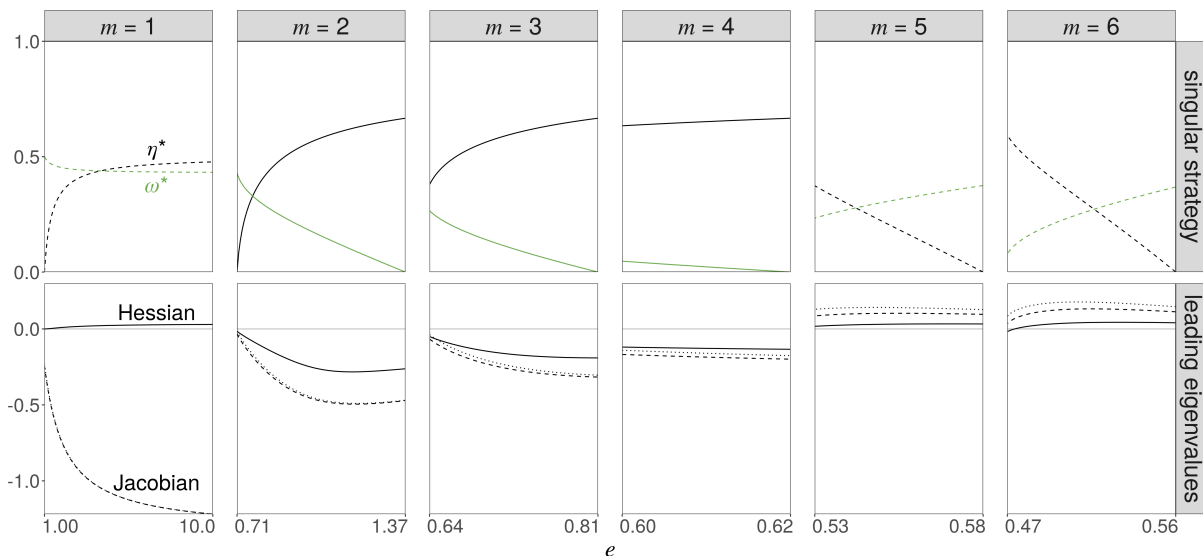

**Figure S1: Properties of the internal singular strategy under monoandry and low polyandry.** Each column describes the unique internal singular strategy for a specific value of  $m$ . **Top row:** value of the singular strategy ( $\omega^*$  in green,  $\eta^*$  in black) within the range of  $e$  for which an internal strategy exists (range given by eqs. B-16 and B-18; Mathematica notebook for value of singular strategy). **Bottom row:** leading eigenvalues of the Jacobian (dashed line; for convergence stability), symmetric part of the Jacobian (dotted line; for strong convergence stability) and Hessian (full line; for evolutionary stability) matrices at the singular strategy (Mathematica notebook for calculations).

**Type 4: Emergence of polymorphism under monandry.** When neither condition (B-16) nor  
998 (B-18) are met and  $m = 1$ , the convergence stable intermediate strategy is invadable (i.e., the Hessian  
has a positive leading eigenvalue; fig. S1, second row, column  $m = 1$ , dashed line). This means that  
1000 once the population has converged to this intermediate strategy, it experiences frequency-dependent  
disruptive selection leading to polymorphism (Geritz et al., 1998; Geritz and Gyllenberg, 2005; Geritz  
1002 et al., 2016). Inspection of the entries of the Hessian matrix reveals that

$$h_{\omega\eta}(z^*)^2 - h_{\omega\omega}(z^*)h_{\eta\eta}(z^*) > 0 \quad (\text{B-20})$$

(fig. S2A, black line) and that  $h_{\omega\omega}(z^*) \leq 0$  and  $h_{\eta\eta}(z^*) \leq 0$  (fig. S2A, green and grey lines). This says  
1004 that disruptive selection in our model is due to correlational selection between caste determination  
and hybridization (i.e. the selection that associates caste determination and hybridization, Phillips  
1006 and Arnold, 1989) and only occurs because both traits are coevolving (i.e. if either trait evolves while  
the other is fixed, the population remains monomorphic, e.g. Mullan et al., 2018). We also find that

$$h_{\omega\eta}(z^*) > 0 \quad (\text{B-21})$$

1008 (fig. S2A, blue line), which tells us that correlational selection is positive (i.e. selection favours a  
positive correlation between caste determination and hybridization within individuals, Phillips and  
1010 Arnold, 1989). This is confirmed by individual based simulations, in which we observe the emer-  
gence of a polymorphism characterised by a positive correlation between  $\omega$  and  $\eta$  within haplotypes  
1012 (fig. 4C and fig. S2B-D).

### B.2.2 Effect of thelytokous parthenogenesis

1014 When we allow for a fraction  $c$  of a queens brood to be produce parthenogenetically, the selection  
gradient (obtained from eq. A-8) is too complicated to be displayed or for singular strategies to be  
1016 found analytically. We therefore go through an invasion analysis similar to above (Appendix B.1.2  
and B.2.1) and again ask: (1) under which conditions and values of  $\omega$  is hybridization avoidance  
1018 ( $\eta = 0$ ) stable? and (2) under which conditions and values of  $\eta$  is worker-loss ( $\omega = 0$ ) stable?

**Stability of hybridization avoidance.** Hybridization avoidance is stable if selection on caste de-  
1020 termination settles for an equilibrium  $\omega^*$  in the absence of hybridization (i.e.  $s_{\omega}(z) = 0$  for some  $\omega^*$ )

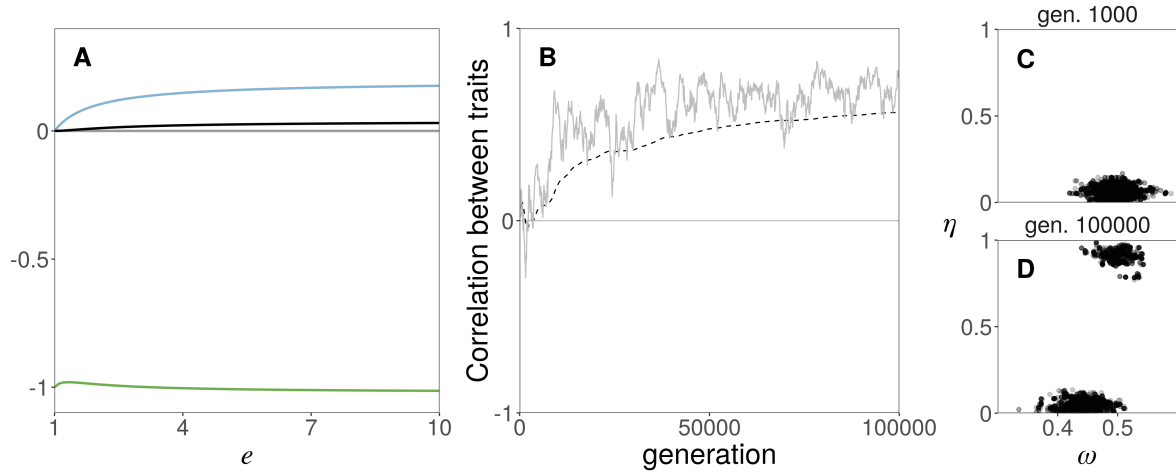

**Figure S2: Polymorphism under monandry is due to positive correlational selection.** **A.** Characteristics of the Hessian matrix at the internal singular strategy as a function of  $e$  for  $m = 1$  (first column of fig. S1 for singular value): quadratic selection coefficient on  $\omega$  ( $h_{\omega\omega}(z^*)$ , in green) and on  $\eta$  ( $h_{\eta\eta}(z^*)$ , in grey); correlational selection ( $h_{\omega\eta}(z^*)$ , in blue) and its relative strength ( $h_{\omega\eta}(z^*)^2 - h_{\omega\omega}(z^*)h_{\eta\eta}(z^*)$ , in black, Mathematica notebook for calculations). **B.** Correlation between genetic values of each trait within haplotypes in a simulated population (in gray, 4000 haplotypes sampled every 100 generations to compute Pearson's correlation coefficient, same replicate as fig. 4C; cumulative mean in black dashed). **C & D** Distribution of genetic values of all haplotypes after 1000 generations (panel C) and after 100000 generations (panel D, same replicate as panel B and fig. 4C).

when  $\eta = 0$ ), and if selection on hybridization at this equilibrium maintains  $\eta$  at zero (i.e.  $s_\eta(z) \leq 0$  when  $\eta = 0$  and  $\omega = \omega^*$ ). These two conditions respectively reduce to,

$$\omega^* = \frac{1+c}{3+c} \left( 1 + \frac{2(1-c)^2}{(c+1)[(1-c)^2 + (c+3)m]} \right), \quad (\text{B-22})$$

and

$$e \leq \frac{3(1+c)}{2(3+c)} + \frac{(1-c)(3-c)}{2(5-c)(c+2m-1)} + \frac{4(3-c)(1-c)^2}{(5-c)(3+c)[(1-c)^2 + (c+3)m]}. \quad (\text{B-23})$$

Condition eq. (B-23) corresponds to the area of the graph below the plain line in fig. 5A-B, where hybridization avoidance is stable. Conversely, the area above the plain line in fig. 5A-B (in blue) is where avoidance is not stable and thus where hybridization evolves.

**Stability of worker-loss.** Similarly, worker-loss is stable if selection on hybridization settles for an equilibrium  $\eta^*$  in the absence of developmental plasticity (i.e.  $s_\eta(z) = 0$  for some  $0 < \eta^* < 1$



when  $\omega = 0$ ). We find that this equilibrium reads as

$$\eta^* = \frac{2}{3} \frac{1}{1-c} \left(1 - \frac{c}{1-m}\right) \quad (\text{B-24})$$

1030 (fig. 5D). The equilibrium eq. (B-24) is between 0 and 1 ( $0 < \eta^* < 1$ ) and selection at this equilibrium maintains worker-loss (i.e.  $s_\omega(z) \leq 0$  when  $\omega = 0$  and  $\eta = \eta^*$ ) when

$$e \geq \frac{1}{4} + \frac{3c}{4} + \frac{3[3-c(12-c)]}{8(c+m-1)} - \frac{9(3-c)(1-c)c}{8(c+m-1)^2} \text{ and } c < \frac{m-1}{3m-1}. \quad (\text{B-25})$$

1032 Note that condition eq. (B-25) is only possible when  $m \geq 2$ . It therefore does not appear in fig. 5A (which is for the case  $m = 1$ ) but corresponds to the area above the dotted line in fig. 5B (which has  
1034  $m = 2$ ).

**Worker-loss coupled with complete hybridization.** In principle, it is also possible with  
1036 parthenogenesis for a population to evolve worker-loss ( $\omega = 0$ ) with complete hybridization ( $\eta = 1$ ) (as parthenogenesis allows the production of queens in the absence of intraspecific matings). We  
1038 therefore further need to determine whether worker-loss can also be stable in the case where  $\eta = 1$  (rather than for some  $0 < \eta^* < 1$ ). We find that selection under worker-loss ( $\omega = 0$ ) and complete  
1040 hybridization ( $\eta = 1$ ) maintains both worker-loss and complete hybridization (i.e.  $s_\omega(z) \leq 0$  and  $s_\eta(z) \geq 0$  where  $z = (\omega, \eta) = (0, 1)$ ) when

$$e \geq \frac{c}{1-c} \text{ and } c \geq \frac{m-1}{3m-1}. \quad (\text{B-26})$$

1042 Condition eq. (B-26) corresponds to the area above the dashed line in fig. 5A-B. While condition eq. (B-25) can only be met only under polyandry ( $m > 1$ ), condition eq. (B-26) can be met for any  
1044 number of mates  $m$ . This means that the evolution of worker-loss under monandry and thelytokous parthenogenesis is always associated with complete hybridization in our model.

### 1046 B.2.3 Effect of non-linear workforce productivity

Our analyses so far have assumed a linear effect of worker number on colony fitness ( $\alpha = 1$  in  
1048 eq. A-2b). Here we investigate how non-linear effects of the number of workers on the pre-mating survival of virgin queens and males influence our results. We restrict our exploration to the case  
1050 where queens mate with an infinite number of males and do not reproduce via parthenogenesis for

simplicity ( $m \rightarrow \infty$  and  $c = 0$ ). With  $\alpha$  in eq (A-2b) as a variable, we find from eq. (A-8) that the  
 1052 selection gradient vector now reads as,

$$s(z) = \begin{pmatrix} s_\omega(z) \\ s_\eta(z) \end{pmatrix} = \begin{pmatrix} \frac{1}{6} \left( \frac{\alpha(1-\eta)}{\eta e + (1-\eta)\omega} - \frac{2}{1-\omega} \right) \\ \frac{1}{1-\eta} \left( \frac{\alpha e}{3[\eta e + (1-\eta)\omega]} - \frac{1+2\alpha}{6} \right) \end{pmatrix}. \quad (\text{B-27})$$

Solving for both of these gradients to vanish simultaneously, we find that there exists a unique sin-  
 1054 gular strategy,

$$\begin{cases} \omega^* = e + \frac{e-1}{3} \\ \eta^* = 1 + \frac{3e}{(e-1)(1+2\alpha)} \end{cases} \quad (\text{B-28})$$

(fig. S3). The Jacobian matrix (eq. A-10) of the system eq. (B-27) at this singular value eq. (B-28)  
 1056 reads as

$$\mathbf{J}(z^*) = \begin{pmatrix} -\frac{3(2+\alpha)}{16(e-1)^2\alpha} & -\frac{(1+2\alpha)^2}{24e\alpha} \\ -\frac{(1+2\alpha)^2}{12e\alpha} & -\frac{(e-1)^2(1+2\alpha)^3}{108e^2\alpha} \end{pmatrix}. \quad (\text{B-29})$$

It is straightforward to show from eq. (B-29) that the singular strategy eq. (B-28) is a repellor, just  
 1058 as under linear effects ( $\alpha = 1$ , eq. B-7). This indicates that as illustrated in fig. 3, the coevolution  
 of caste determination and hybridization under non-linear effects also lead to either hybridization  
 1060 avoidance or worker-loss depending on parameters and initial conditions.

We can gain further insights into the influence of non-linear effects by determining when the sin-  
 1062 gular strategy eq. (B-28) is within the trait space (i.e., when  $0 < \omega^*, \eta^* < 1$ ). We find that this is the  
 case when

$$\frac{1}{4} < e < \frac{1+2\alpha}{4+2\alpha} \quad (\text{B-30})$$

(light green region in fig. S3). This means that the threshold value for worker efficiency  $e$  above  
 1064 which worker-loss can evolve is  $1/4$  (as under linear effects  $\alpha = 1$ ). Condition (B-30) further shows  
 1066 that the threshold for  $e$  above which worker-loss always evolves (i.e. independently from initial  
 conditions, fig. 3D for e.g.) increases with  $\alpha$  (dark green region in fig. S3). In other words, the evolu-  
 1068 tion of worker loss is facilitated under diminishing ( $\alpha < 1$ , fig. S3A) and impaired under increasing  
 returns ( $\alpha > 1$ , fig. S3C).

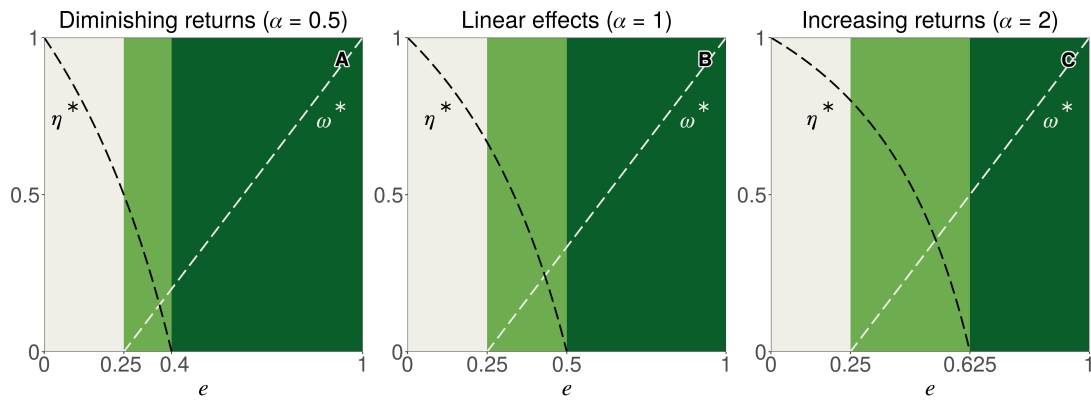

**Figure S3: Non-linear effects of investment in workers.** Singular values for  $\eta$  (in black) and  $\omega$  (in white) as a function of hybrid worker efficiency  $e$  (given by eq. B-28).
